# Supplementary material for: Effect of albumin-globulin score and albumin to globulin ratio on survival in patients with heart failure: a retrospective cohort study in China
Source: PubMed Central journal article supplement — BMJ Open. 2018 Jul 6;8(7):e022960. doi: 10.1136/bmjopen-2018-022960 (PMC6042582; doi:10.1136/bmjopen-2018-022960), 2018-07-06
Supplement: bmjopen-2018-022960.draft_revisions.pdf [file bmjopen-2018-022960.draft_revisions.pdf]

# BMJ Open

BMJ Open is committed to open peer review. As part of this commitment we make the peer review history of every article we publish publicly available.

When an article is published we post the peer reviewers' comments and the authors' responses online. We also post the versions of the paper that were used during peer review. These are the versions that the peer review comments apply to.

The versions of the paper that follow are the versions that were submitted during the peer review process. They are not the versions of record or the final published versions. They should not be cited or distributed as the published version of this manuscript.

BMJ Open is an open access journal and the full, final, typeset and author-corrected version of record of the manuscript is available on our site with no access controls, subscription charges or pay-per-view fees (<http://bmjopen.bmj.com>).

If you have any questions on BMJ Open's open peer review process please email [info.bmjopen@bmj.com](mailto:info.bmjopen@bmj.com)

# BMJ Open

## The effect of albumin-globulin score and albumin/globulin ratio on survival in patients with heart failure

|                               |                                                                                                                                                                                                                                                                                                                                                                 |
|-------------------------------|-----------------------------------------------------------------------------------------------------------------------------------------------------------------------------------------------------------------------------------------------------------------------------------------------------------------------------------------------------------------|
| Journal:                      | <i>BMJ Open</i>                                                                                                                                                                                                                                                                                                                                                 |
| Manuscript ID                 | bmjopen-2018-022960                                                                                                                                                                                                                                                                                                                                             |
| Article Type:                 | Research                                                                                                                                                                                                                                                                                                                                                        |
| Date Submitted by the Author: | 16-Mar-2018                                                                                                                                                                                                                                                                                                                                                     |
| Complete List of Authors:     | Li, Kuan; Henan Provincial People's Hospital, Zhengzhou, Department of Infectious Disease<br>Fu, Wanrong; he First Affiliated Hospital of Zhengzhou University, b. Department of Cardiology<br>Bo, Yacong; Henan Provincial People's Hospital, Zhengzhou, Department of Emergency<br>Zhu, Yongjian; Henan Provincial People's Hospital, Department of Emergency |
| Keywords:                     | albumin, globulin, survival, Heart failure < CARDIOLOGY                                                                                                                                                                                                                                                                                                         |
|                               |                                                                                                                                                                                                                                                                                                                                                                 |

SCHOLARONE™  
Manuscripts

View Only

# The effect of albumin-globulin score and albumin/globulin ratio on survival in patients with heart failure

Kuan Li<sup>a#</sup>, Wanrong Fu<sup>b</sup>, Yacong Bo<sup>c\*</sup>, Yongjian Zhu<sup>c\*</sup>

- a. Department of Infectious Disease, Henan Provincial People's Hospital, Zhengzhou, China
- b. Department of Cardiology, The First Affiliated Hospital of Zhengzhou University, Zhengzhou, Henan, China
- c. Department of Emergency, Henan Provincial People's Hospital, Zhengzhou, China

Corresponding author: Yongjian Zhu, M.D. Department of Emergency, Henan Provincial People's Hospital, Zhengzhou, China. Email: [zhu412825@126.com](mailto:zhu412825@126.com) Tel: 86+13938404577, Fax: 86+37167781868; Yacong Bo, M.D. Department of Emergency, Henan Provincial People's Hospital, Zhengzhou, China. Email: [boyacong@163.com](mailto:boyacong@163.com) Tel: 86+15639748761, Fax: 86+37167781868;

## Abstracts

**OBJECTIVES:** To investigate the combined effect of albumin (ALB) and globulin (GLB) on the overall survival of patients with heart failure (HF).

**DESIGN:** Retrospective cohort study.

**SETTING:** A Hospital.

**PARTICIPANTS:** 404 firstly diagnosed with heart failure patients.

**MEASUREMENTS:** Serum ALB and GLB were measured within three days after admission. The albumin/globulin ratio (AGR) was calculated as the ALB divided by the GLB. The receiver operating characteristic (ROC) curve was used to calculate the cut-off point of ALB, GLB, and AGR. Patients with low ALB levels ( $\leq 35.3$ g/L) and high GLB levels ( $>27.0$  g/L) were assigned an albumin-globulin score AGS of 2, those with only one of the two abnormalities were assigned an AGS of 1, and those with neither of the two abnormalities were assigned an AGS of 0.

**RESULTS:** The mean age of the 404 patients was  $62.69 \pm 15.62$ , and 54.5% were male. During follow-up, 14 patients lost to follow up. 120 patients died from HF and 211 patients were hospital readmitted for worsening HF. Univariate cox regression analysis showed that higher AGR was significantly associated with favorable overall survival (OS) (HR, 0.61; 95% CI, 0.38-0.98;  $P= 0.040$ ) but not AGS.

1  
2  
3  
4                   **CONCLUSION:** Serum levels of ALB and GLB are objective and  
5  
6 easily measurable biomarkers, which can be used in combination to  
7  
8 predict the survival of patients with HF.  
9

10  
11 **Key words:** albumin; globulin; survival; heart failure  
12  
13

### 14 15 16 17 **Strengths and limitations of this study** 18

- 19  
20       • This is the first study investigating the prognostic value of AGS  
21           and AGR in patients with HF.  
22
- 23       • The cohort study design.  
24
- 25       • To avoid bias, only patients firstly diagnosed with heart failure  
26           were selected.  
27
- 28       • The information bias could not be avoided owing to the  
29           retrospective cohort study design.  
30  
31  
32  
33  
34  
35  
36  
37  
38  
39  
40  
41  
42  
43  
44  
45  
46  
47  
48  
49  
50  
51  
52  
53  
54  
55  
56  
57  
58  
59  
60

## Introduction

Heart failure (HF) is a global public health problem, with a prevalence of more than 23 million worldwide<sup>1 2</sup>. In China, there are 4.2 million people living with HF, with 500, 000 new cases diagnosed each year, and this number is expected to increase still further<sup>3</sup>, causing enormous social and economic burden. Over the last 30 years, although great improvements have been made in drug and device therapy, the survival and the hospitalization rate in HF patients often remains unsatisfactory<sup>4 5</sup>. Hence, identification of promising prognostic factors contributing to the risk classification and clinical management of such patients could improve their long-term survival.

Numerous prognostic markers of death and/or HF hospitalization have been identified in patients with HF. In recent decades, several multivariable prognostic risk scores have been developed for different populations of patients with HF<sup>6-8</sup>. However, their clinical applicability is limited and precise risk stratification in HF remains challenging. Simple but effective prognostic biomarkers model are needed to improve the management of the HF epidemic.

The correlation between serum albumin (ALB) and globulin (GLB) with HF has recently been emphasized. Albumin and globulin, the two major components of serum proteins, have been confirmed to be involved in the systemic inflammatory process. Serum albumin, one of the

1  
2  
3  
4  
5  
6  
7  
8  
9  
10  
11  
12  
13  
14  
15  
16  
17  
18  
19  
20  
21  
22  
23  
24  
25  
26  
27  
28  
29  
30  
31  
32  
33  
34  
35  
36  
37  
38  
39  
40  
41  
42  
43  
44  
45  
46  
47  
48  
49  
50  
51  
52  
53  
54  
55  
56  
57  
58  
59  
60

biochemical tests, not only indicates nutritional status but also relates to chronic inflammation in HF<sup>9 10</sup>. Moreover, increased levels of GLB could serve as markers of chronic inflammation response and reflect a cumulative exposure of various proinflammatory cytokines<sup>11</sup>. Previous studies have demonstrated that hypoalbuminemia was associated with impaired survival in HF patients<sup>12</sup>. However, no studies investigated the cumulative effect of both ALB and GLB on HF patients. Therefore, the purpose of this present study was to assess the effect of the albumin-globulin score (AGS) and albumin/globulin ratio (AGR) on long-term survival among HF patients.

## Methods and material

### Participants

Between January 2010 and September 2015, 404 consecutive patients who were firstly diagnosed as HF at the First Affiliated Hospital of Zhengzhou University were included. The diagnosis of HF was based on a history of dyspnea with symptomatic exercise intolerance, and signs of documentation of left ventricular enlargement or peripheral edema or pulmonary congestion or radionuclide ventriculography or dysfunction by chest X-ray and/or echocardiography.<sup>13</sup> Informed consent was obtained from all patients prior to participation, and the study was approved by Zhengzhou University Committee. All methods were performed in

1  
2  
3  
4 accordance with the relevant guidelines and regulations.  
5

6 The exclusion criteria for patients were as follows: (1) Acute  
7 coronary syndromes; (2) no echocardiographic structural or functional  
8 abnormalities; (3) without HF; and (4) dead before discharge  
9  
10  
11  
12  
13

#### 14 **Patient and Public Involvement**

15  
16  
17 All participants were given written informed consent before they  
18 joined the study for authorizing to use the data generated from the  
19 medical information system. The research question and outcome  
20 measures were handed out by hardcopy to each patient. Patients were not  
21 involved in the recruitment and conduct of the study. The results will be  
22 mailed to each participant.  
23  
24  
25  
26  
27  
28  
29  
30  
31  
32

#### 33 **Clinical and laboratory parameters**

34  
35  
36  
37 Patients' baseline characteristics including demographic parameters,  
38 comorbidities, medications, and laboratory variables were retrospectively  
39 reviewed and collected from the electronic medical records by two  
40 researchers. Fasting venous blood samples were collected from all  
41 patients within three days after admission, and were immediately sent for  
42 analysis. The serum levels of ALB, GLB and other variables were  
43 assayed by using an automatic biochemical analyzer (Hitachi 7600,  
44 Japan). The receiver operating characteristic (ROC) curve was used to  
45  
46  
47  
48  
49  
50  
51  
52  
53  
54  
55  
56  
57  
58  
59  
60



1  
2  
3 calculate the cut-off point of ALB, GLB, and AGR. Patients with low  
4 ALB levels ( $\leq 35.3$ g/L) and high GLB levels ( $>27.0$  g/L) were assigned  
5  
6 an AGS of 2, those with only one of the two abnormalities were assigned  
7  
8 an AGS of 1, and those with neither of the two abnormalities were  
9  
10 assigned an AGS of 0. AGS=1-2 was defined as high, AGS=0 was  
11  
12 defined as low, AGR $> 1.48$  was defined as high, and AGR $\leq 1.48$  was  
13  
14 defined as low.  
15  
16  
17  
18  
19  
20

### 21 **Follow-up**

22  
23  
24 All patients were followed-up every 3 months for the first 2 years,  
25  
26 every 6 months in the third, every 1 year afterwards. The primary  
27  
28 endpoint was death due to a cardiovascular event (myocardial infarction,  
29  
30 progressive HF, stroke, other vascular causes, or sudden cardiac death),  
31  
32 the second endpoint was progressive HF requiring re-hospitalization.  
33  
34 Follow-up evaluations were performed every 3 months for the first 2  
35  
36 years, every 6 months for the second year, and yearly thereafter.  
37  
38 Follow-up was performed until patient death, or until July 2016, which  
39  
40 was the cut-off date for this study.  
41  
42  
43  
44  
45  
46  
47

### 48 **Statistical Analysis**

49  
50  
51 The analysis of variance (ANOVA) was used to examine the  
52  
53 differences of continuous variable (age, Albumin, BNP, IVST, PWT,  
54  
55  
56  
57  
58  
59  
60

1  
2  
3 LVD<sub>v</sub>, LVS<sub>v</sub>, LVEF, and LAD), and the chi-square test was used to assess  
4  
5 the difference of categorical variables (including gender, Hypertension,  
6  
7 Diabetes mellitus, CKD, Prior history of HF, DCM, HCM, HHD, AF, and  
8  
9 Medications). The Kaplan-Meier method with Log-rank test was used to  
10  
11 estimate survival curves. Univariable cox regression analysis was used to  
12  
13 identify variables associated with overall survival time. Variables with a  
14  
15  $P < 0.05$  on univariable analysis were further assessed with a multivariable  
16  
17 Cox regression model. SPSS 21 software (IBM Corp, Armonk, NY) was  
18  
19 used for the statistical analysis. The level of significance was established  
20  
21 as a two-sided  $P$  value 0.05.  
22  
23  
24  
25  
26  
27  
28

## 29 **Results**

30  
31  
32 The baseline characteristics of patients are presented in table 1. A  
33  
34 total of 404 patients with HF whose mean age was  $62.70 \pm 15.62$  years  
35  
36 old entered the analysis. Among them, 260 patients (64.25%) were  
37  
38 classified as high AGS, 189 patients (46.78%) were classified as higher  
39  
40 AGR. Patients with lower AGS were more often among individuals  
41  
42 without chronic kidney disease (CKD), with idiopathic dilated  
43  
44 cardiomyopathy (DCM), using beta-blocker and angiotensin converting  
45  
46 enzyme inhibitor (ACE-I), they also had lower B-type natriuretic peptide  
47  
48 (BNP), higher left ventricular end-systolic volume (LVS<sub>v</sub>), higher left  
49  
50 ventricular ejection fraction (LVEF), and lower left atrial dimension  
51  
52  
53  
54  
55  
56  
57  
58  
59  
60

1  
2  
3 (LAD). Patients with higher AGR were more often among individuals  
4 without diabetes mellitus, without coronary heart disease (CHD), with  
5 DCM, using beta-blocker ACE-I, they also had lower B-type natriuretic  
6 peptide (BNP).  
7  
8  
9  
10  
11

12  
13 By July 2016, 404 patients had been followed up. 120 patients died,  
14 211 patients were hospital readmitted, and 14 patients lost to follow up.  
15 The follow-up rate was 96.5%. The mean and median survival times were  
16 47.23 months and 62.00 months, respectively. Figures 1 and 2 showed the  
17 Kaplan-Meier curves of overall survival and hospital free survival  
18 according to AGR ( $>1.48$  vs.  $\leq 1.48$ ) and AGS (0 vs. 1-2).  
19  
20  
21  
22  
23  
24  
25  
26  
27

28 As shown in table 2, univariate analysis showed that higher AGR  
29 and lower AGS were significantly associated with favorable overall  
30 survival 0.54 (0.37-0.80) and 0.56 (0.37-0.84), respectively. Moreover,  
31 age (per year), CKD (yes vs. no), BNP (per 100 pg/mL), LVDv (per ml),  
32 LVSv (per ml), and LAD (per mm) were other significant prognostic  
33 variables identified by univariate analysis. On multivariate analysis, AGR  
34 remained to be an independent predictor for overall survival (HR, 0.61;  
35 95% CI, 0.38-0.98), but not AGS (HR, 0.81; 95% CI, 0.41-1.57).  
36  
37  
38  
39  
40  
41  
42  
43  
44  
45  
46

47 The univariate and multivariate analysis of rehospitalization are  
48 presented in Table 3. Univariate analysis showed that AGR and AGS had  
49 no significant effect on rehospitalization 0.92 (0.70-1.22) and 0.99  
50 (0.75-1.32), respectively. However, age (per year), CKD (yes vs. no),  
51  
52  
53  
54  
55  
56  
57

1  
2  
3  
4 Prior history of HF (yes vs. no), BNP (per 100 pg/mL), IVST (per mm),  
5  
6 and LAD (per mm) were significant prognostic variables for  
7  
8 rehospitalization. On multivariate analysis, age (per year), CKD (yes vs.  
9  
10 no), IVST (per mm), and LAD (per mm) were independent prognostic  
11  
12 indicator for rehospitalization.  
13  
14  
15

## 16 **Discussion**

17  
18  
19  
20 This study showed that the combination of ALB and GLB have  
21  
22 potential predictive effect in predicting survival in patients with HF,  
23  
24 higher AGR was significantly associated with favorable overall survival  
25  
26 among patients with HF. To the best of our knowledge, this is the first  
27  
28 study investigating the prognostic value of AGS and AGR in patients with  
29  
30 HF.  
31  
32  
33

34  
35 The prediction of HF prognosis is a cornerstone of HF management.  
36  
37 Accurately predicting prognosis can be of benefit for patients with heart  
38  
39 failure. Patients with a poorer prognosis might benefit more from  
40  
41 aggressive treatment and a closer follow-up<sup>14</sup>. There exist previous risk  
42  
43 models for patients with HF<sup>15 16</sup>, which adopted a systems biology  
44  
45 approach, by incorporating information from demographic, biomarker,  
46  
47 genomic, proteomic, and the initial response to therapy might create a  
48  
49 more effective prediction model and hopefully aid in understanding HF  
50  
51 prognosis. However, these models are complex in clinical application and  
52  
53  
54  
55  
56  
57  
58  
59  
60

1  
2  
3 just provide moderate accuracy prediction in survival and  
4 rehospitalization in patients with HF<sup>17</sup>. Hence, designing a simple  
5 survival model based on routine blood biochemical indexes for clinician  
6 is helpful for better identification high risk HF patients.  
7  
8  
9  
10  
11  
12

13 The role of serum albumin is complex. Serum albumin is  
14 synthesized in the liver and plays multiple physiological roles, including  
15 maintenance of pH and normal microvascular permeability and mediation  
16 of coagulation, and has antioxidant properties<sup>18</sup>. The decrease in plasma  
17 albumin concentration may be due to malnutrition and cachexia  
18 (decreased albumin intake)<sup>19</sup>, diffuse inflammation (increased albumin  
19 consumption)<sup>20</sup>, renal impairment (increased urinary albumin loss)<sup>21</sup>,  
20 plasma volume expansion (dilutional hypoalbuminemia) and hepatic  
21 dysfunction (decreased albumin synthesis)<sup>22 23</sup>. Serum albumin is used in  
22 assessment of protein malnutrition without calorie malnutrition in which  
23 serum albumin becomes low without affection of anthropometric  
24 measurements<sup>24</sup>. Malnutrition was found to be associated with worsening  
25 of symptoms and poor prognosis. Multiple European studies showed  
26 malnourished heart failure patients are weaker and fatigue earlier<sup>25 26</sup>.  
27 Heart failure with hypoalbuminemia, as indicator of malnutrition, was  
28 found to be associated with higher New York heart association (NYHA)  
29 functional class, elevated serum blood urea nitrogen and C-reactive  
30 protein<sup>24</sup>. It should be noted that although hypoalbuminemia might reflect  
31  
32  
33  
34  
35  
36  
37  
38  
39  
40  
41  
42  
43  
44  
45  
46  
47  
48  
49  
50  
51  
52  
53  
54  
55  
56  
57  
58  
59  
60

1  
2  
3 poor nutritional status, albumin reduction in chronic inflammation  
4 is frequent<sup>11</sup>.  
5  
6

7  
8 Similar to the low albumin, high non-albumin protein was a  
9 predictor of mortality in HF patients. We postulate that the high serum  
10 non-albumin proteins status is a marker of inflammation in HF patients.  
11  
12 Chronic inflammation is known to increase acute-phase proteins (eg,  
13 C-reactive protein [CRP], serum amyloid A, complement C3, fibrinogen,  
14 ceruloplasmin), which constitute part of the calculated globulins<sup>11</sup>. And  
15 the increased level of globulin serves as a marker of chronic  
16 inflammation and reflects cumulative exposure to various  
17 pro-inflammatory cytokines such as interleukins (IL), particularly IL-6  
18 and IL-1b, and tumor necrosis factor-a, which stimulates the production  
19 of acute-phase proteins<sup>11</sup>. Chronic inflammation is a critical contributor to  
20 HF occurrence, development, survival, and is also related to the risk of  
21 recurrence among HF patients<sup>27</sup>. Hence, we propose that low AGR and  
22 high AGS measure the extent of such activities related to chronic  
23 inflammation, which influence mortality.  
24  
25  
26  
27  
28  
29  
30  
31  
32  
33  
34  
35  
36  
37  
38  
39  
40  
41  
42  
43  
44

45 What's more, we found that LAD was a significant independent  
46 predictor for the long-term survival and rehospitalization in HF patients.  
47  
48 The result is consistent with previous research findings<sup>28</sup>. As a predictor  
49 reflecting left atrium (LA) structural remodeling, LAD relates to all key  
50 risk factors for AF, such as advancing age, male sex, and greater blood  
51  
52  
53  
54  
55  
56  
57  
58  
59  
60

1  
2  
3 pressure<sup>29</sup>. LA enlargement, as characterized by echocardiographic LAD,  
4 is related to incident AF, heart failure, stroke, and mortality<sup>28 30-33</sup>.  
5  
6 Moreover, LA enlargement can reflect atrial volume or pressure overload  
7  
8 in valvular or ischemic heart disease, or as a consequence of AF<sup>34-36</sup>.  
9  
10

11  
12  
13 Prior studies have demonstrated that low serum albumin is an  
14 independent predictor of HF long-term mortality. Liu et.al showed that  
15 patients with hypoalbuminemia had a significantly lower survival rate (53%  
16 vs. 84%, log-rank  $\chi(2) = 53.3$ ,  $P < 0.001$ ) and a higher rate of  
17 cardiovascular death (21.8% vs. 8.9% ,  $P < 0.001$ )<sup>37</sup>. Su et.al. reported  
18 that the patients with higher NT-pro BNP and lower albumin than median  
19 had the highest risk for cardiac events (HR, 2.89, CI 1.90-4.40,)<sup>38</sup>. The  
20 finding of our study that AGR is independent predictor of long-term  
21 mortality in HF patients was consistent with previous studies.  
22  
23  
24  
25  
26  
27  
28  
29  
30  
31  
32  
33  
34  
35

## 36 **Conclusions**

37  
38  
39 In conclusion, the present study suggests that the AGR is convenient  
40 and effective tool to predict the overall survival time in HF patients.  
41  
42 Further larger prospective studies are required to validate this finding and  
43  
44 to investigate other prognostic indicators in HF patients.  
45  
46  
47  
48  
49  
50

## 51 **Conflict of interests**

52  
53  
54 The authors declare that they have no conflict of interests.  
55  
56  
57

## Authors' contributions

Kuan Li and Yongjian Zhu designed the study and provided critical review of the manuscript. Yongjian Zhu, Yacong Bo and Wanrong Fu reviewed the literature. Yongjian Zhu and Kuan Li analyzed the data and wrote the first draft of the manuscript. Yacong Bo, Wanrong Fu, and Yongjian Zhu revised the manuscript.

For peer review only



## Reference

1. Mosterd A, Hoes AW (2007) Clinical epidemiology of heart failure. *Heart (British Cardiac Society)* **93**, 1137-1146. doi: 10.1136/hrt.2003.025270
2. Roger VL (2013) Epidemiology of heart failure. *Circulation research* **113**, 646-659. doi: 10.1161/CIRCRESAHA.113.300268
3. Lam CS, Teng TK, Tay WT *et al.* (2016) Regional and ethnic differences among patients with heart failure in Asia: the Asian sudden cardiac death in heart failure registry. *European heart journal*. **37**, 3141-3153. doi: 10.1093/eurheartj/ehw331
4. Maggioni AP, Dahlstrom U, Filippatos G *et al.* (2013) EURObservational Research Programme: regional differences and 1-year follow-up results of the Heart Failure Pilot Survey (ESC-HF Pilot). *European journal of heart failure* **15**, 808-817. doi: 10.1093/eurjhf/hft050
5. Tsuchihashi-Makaya M, Hamaguchi S, Kinugawa S *et al.* (2009) Characteristics and outcomes of hospitalized patients with heart failure and reduced vs preserved ejection fraction. Report from the Japanese Cardiac Registry of Heart Failure in Cardiology (JCARE-CARD). *Circulation journal : official journal of the Japanese Circulation Society* **73**, 1893-1900. doi: 10.1253/circj.CJ-09-0254
6. Lupon J, de Antonio M, Vila J *et al.* (2014) Development of a novel heart failure risk tool: the barcelona bio-heart failure risk calculator (BCN bio-HF calculator). *PloS one* **9**, e85466. doi: 10.1371/journal.pone.0085466
7. Levy WC, Mozaffarian D, Linker DT *et al.* (2006) The Seattle Heart Failure Model: prediction of survival in heart failure. *Circulation* **113**, 1424-1433. doi: 10.1161/CIRCULATIONAHA.105.584102
8. Mozaffarian D, Anker SD, Anand I *et al.* (2007) Prediction of mode of death in heart failure: the Seattle Heart Failure Model. *Circulation* **116**, 392-398. doi: 10.1161/CIRCULATIONAHA.106.687103
9. Gopal DM, Kalogeropoulos AP, Georgiopoulou VV *et al.* (2010) Serum albumin concentration and heart failure risk The Health, Aging, and Body Composition Study. *American heart journal* **160**, 279-285. doi: 10.1016/j.ahj.2010.05.022
10. Horwich TB, Kalantar-Zadeh K, MacLellan RW *et al.* (2008) Albumin levels predict survival in patients with systolic heart failure. *American heart journal* **155**, 883-889. doi: 10.1016/j.ahj.2007.11.043
11. Gabay C1, Kushner I. (1991) Acute-Phase Proteins and Other Systemic Responses to Inflammation. *The New England journal of medicine* **340**, 448-454. doi: 10.1056/NEJM199902113400607
12. Grodin JL, Lala A, Stevens SR *et al.* (2016) Clinical Implications of Serum Albumin Levels in Acute Heart Failure: Insights From DOSE-AHF and ROSE-AHF. *Journal of cardiac failure*. doi: 10.1016/j.cardfail.2016.01.015
13. Fu T, Bu ZD, Li ZY *et al.* (2015) Neoadjuvant chemoradiation therapy for resectable esophago-gastric adenocarcinoma: a meta-analysis of randomized clinical trials. *BMC cancer* **15**, 322. doi: 10.1186/s12885-015-1341-7
14. Ouwerkerk W, Voors AA, Zwinderman AH (2014) Factors influencing the predictive power of models for predicting mortality and/or heart failure hospitalization in patients with heart failure. *JACC Heart failure* **2**, 429-436. doi: 10.1016/j.jchf.2014.04.006.
15. Giamouzis G, Kalogeropoulos A, Georgiopoulou V *et al.* (2011) Hospitalization epidemic in patients with heart failure: risk factors, risk prediction, knowledge gaps, and future directions. *Journal of cardiac failure* **17**, 54-75. doi: 10.1016/j.cardfail.2010.08.010.

16. Betihavas V, Davidson PM, Newton PJ *et al.* (2012) What are the factors in risk prediction models for rehospitalisation for adults with chronic heart failure? *Australian critical care : official journal of the Confederation of Australian Critical Care Nurses* **25**, 31-40. doi: 10.1016/j.aucc.2011.07.004.
17. Rahimi K, Bennett D, Conrad N *et al.* (2014) Risk prediction in patients with heart failure: a systematic review and analysis. *JACC Heart failure* **2**, 440-446. doi: 10.1016/j.jchf.2014.04.008.
18. Roche M, Rondeau P, Singh NR *et al.* (2008) The antioxidant properties of serum albumin. *FEBS letters* **582**, 1783-1787. doi: 10.1016/j.febslet.2008.04.057.
19. Lourenco BH, Vieira LP, Macedo A *et al.* (2009) Nutritional status and adequacy of energy and nutrient intakes among heart failure patients. *Arquivos brasileiros de cardiologia* **93**, 541-548.
20. Wrigley BJ, Lip GY, Shantsila E (2011) The role of monocytes and inflammation in the pathophysiology of heart failure. *European journal of heart failure* **13**, 1161-1171. doi: 10.1093/eurjhf/hfr122.
21. Zamora E, Lupon J, Vila J *et al.* (2012) Estimated glomerular filtration rate and prognosis in heart failure: value of the Modification of Diet in Renal Disease Study-4, chronic kidney disease epidemiology collaboration, and cockcroft-gault formulas. *Journal of the American College of Cardiology* **59**, 1709-1715. doi: 10.1016/j.jacc.2011.11.066.
22. Adlbrecht C, Kommata S, Hulsmann M *et al.* (2008) Chronic heart failure leads to an expanded plasma volume and pseudoanaemia, but does not lead to a reduction in the body's red cell volume. *European heart journal* **29**, 2343-2350. doi: 10.1093/eurheartj/ehn359.
23. Herzer K, Kneiseler G, Bechmann LP *et al.* (2011) Onset of heart failure determines the hepatic cell death pattern. *Annals of hepatology* **10**, 174-179.
24. Amare H, Hamza L, Asefa H (2015) Malnutrition and associated factors among heart failure patients on follow up at Jimma university specialized hospital, Ethiopia. *BMC cardiovascular disorders* **15**, 128. doi: 10.1186/s12872-015-0111-4.
25. Jacobsson A, Pihl-Lindgren E, Fridlund B (2001) Malnutrition in patients suffering from chronic heart failure; the nurse's care. *European journal of heart failure* **3**, 449-456. doi: 10.1016/S1388-9842(01)00139-8
26. Anker SD, Steinborn W, Strassburg S (2004) Cardiac cachexia. *Annals of medicine* **36**, 518-529. doi: 10.1080/07853890410017467
27. Dick SA, Epelman S (2016) Chronic Heart Failure and Inflammation: What Do We Really Know? *Circulation research* **119**, 159-176. doi: 10.1161/CIRCRESAHA.116.308030.
28. Ristow B, Ali S, Whooley MA *et al.* (2008) Usefulness of left atrial volume index to predict heart failure hospitalization and mortality in ambulatory patients with coronary heart disease and comparison to left ventricular ejection fraction (from the Heart and Soul Study). *The American journal of cardiology* **102**, 70-76. doi: 10.1016/j.amjcard.2008.02.099.
29. McManus DD, Yin X, Gladstone R *et al.* (2016) Alcohol Consumption, Left Atrial Diameter, and Atrial Fibrillation. *Journal of the American Heart Association* **5**. doi: 10.1161/JAHA.116.004060.
30. McManus DD, Xanthakis V, Sullivan LM *et al.* (2010) Longitudinal tracking of left atrial diameter over the adult life course: Clinical correlates in the community. *Circulation* **121**, 667-674. doi: 10.1161/CIRCULATIONAHA.
31. Vaziri SM, Larson MG, Benjamin EJ *et al.* (1994) Echocardiographic predictors of nonrheumatic atrial fibrillation. The Framingham Heart Study. *Circulation* **89**, 724-730. doi: 10.1161/01.CIR.89.2.724
32. Kizer JR, Bella JN, Palmieri V *et al.* (2006) Left atrial diameter as an independent predictor of first clinical cardiovascular events in middle-aged and elderly adults: the Strong Heart Study (SHS).

1  
2  
3 *American heart journal* **151**, 412-418. doi: 10.1016/j.ahj.2005.04.031

4 33. Benjamin EJ, D'Agostino RB, Belanger AJ *et al.* (1995) Left atrial size and the risk of stroke and  
5 death. The Framingham Heart Study. *Circulation* **92**, 835-841. doi: 10.1161/01.CIR.89.2.724

6 34. Sanfilippo AJ, Abascal VM, Sheehan M *et al.* (1990) Atrial enlargement as a consequence of atrial  
7 fibrillation. A prospective echocardiographic study. *Circulation* **82**, 792-797. doi:  
8 10.1161/01.CIR.82.3.792

9 35. Abhayaratna WP, Seward JB, Appleton CP *et al.* (2006) Left atrial size: physiologic determinants  
10 and clinical applications. *Journal of the American College of Cardiology* **47**, 2357-2363. doi:  
11 10.1016/j.jacc.2006.02.048

12 36. Pritchett AM, Mahoney DW, Jacobsen SJ *et al.* (2005) Diastolic dysfunction and left atrial volume: a  
13 population-based study. *Journal of the American College of Cardiology* **45**, 87-92. doi:  
14 10.1016/j.jacc.2004.09.054

15 37. Liu M, Chan CP, Yan BP *et al.* (2012) Albumin levels predict survival in patients with heart failure  
16 and preserved ejection fraction. *European journal of heart failure* **14**, 39-44. doi:  
17 10.1093/eurjhf/hfr154.

18 38. Su W, An T, Zhou Q *et al.* (2012) Serum albumin is a useful prognostic indicator and adds  
19 important information to NT-proBNP in a Chinese cohort of heart failure. *Clinical biochemistry* **45**,  
20 561-565. doi: 10.1016/j.clinbiochem.

## Tables

Table 1 Correlation between AGS, AGR, and clinicopathologic parameters in 404 chronic heart failure patients

| Variables                 | AGS (High=260, Low=144) |                 |          | AGR (High=189, Low=215) |                 |          |
|---------------------------|-------------------------|-----------------|----------|-------------------------|-----------------|----------|
|                           | High (1-2)              | Low (0)         | <i>P</i> | High (>1.48)            | Low (≤1.48)     | <i>P</i> |
| Age (years)               | 63.82±15.63             | 60.67±15.45     | 0.051    | 59.46±15.34             | 65.41±15.34     | <0.001   |
| Gender                    |                         |                 |          |                         |                 |          |
| Male                      | 133(51.2%)              | 87 (60.4%)      | 0.073    | 111(58.7%)              | 109(51.2%)      | 0.129    |
| Albumin(g/dl)             | 37.39±6.15              | 36.49±9.24      | 0.242    | 36.56±8.49              | 37.50±6.28      | 0.203    |
| Hypertension              | 107(41.2%)              | 59(41.0%)       | 0.972    | 78(41.3%)               | 88(41.3%)       | 0.993    |
| Diabetes mellitus         | 80(30.8%)               | 32(22.2%)       | 0.066    | 42(22.2%)               | 70(32.9%)       | 0.018    |
| CKD                       | 32(12.3%)               | 7(4.9%)         | 0.015    | 16(8.5%)                | 23(10.8%)       | 0.430    |
| Prior history of          |                         |                 |          |                         |                 |          |
| HF                        | 185(71.2%)              | 110(76.4%)      | 0.256    | 145(76.7%)              | 148(69.5%)      | 0.103    |
| VHD                       | 35(13.5%)               | 18(12.5%)       | 0.784    | 24(12.7%)               | 29(13.6%)       | 0.786    |
| CHD                       | 118(45.4%)              | 68(47.2%)       | 0.723    | 75(39.7%)               | 110(51.6%)      | 0.016    |
| DCM                       | 39(15.0%)               | 33(22.9%)       | 0.046    | 47(24.9%)               | 25(11.7%)       | 0.001    |
| HCM                       | 7(2.7%)                 | 2(1.4%)         | 0.395    | 5(2.6%)                 | 4(1.9%)         | 0.604    |
| HHD                       | 5(1.9%)                 | 5(3.5%)         | 0.337    | 5(2.6%)                 | 5(2.3%)         | 0.848    |
| AF                        | 81(31.2%)               | 40(27.8%)       | 0.478    | 60(31.7%)               | 60(28.2%)       | 0.434    |
| BNP (pg/mL)               | 7262.94±7634.99         | 4201.68±5032.32 | <0.001   | 5175.84±6486.63         | 7122.99±7318.87 | 0.007    |
| Echocardiography findings |                         |                 |          |                         |                 |          |
| IVST (mm)                 | 10.03±1.86              | 9.67±1.63       | 0.082    | 9.87±1.74               | 9.94±1.83       | 0.748    |
| PWT (mm)                  | 9.59±1.67               | 9.38±1.50       | 0.247    | 9.45±1.51               | 9.59±1.71       | 0.447    |
| LVDv (ml)                 | 172.86±123.37           | 187.86±85.67    | 0.245    | 183.94±86.00            | 172.71±131.69   | 0.367    |
| LVSv (ml)                 | 94.21±73.03             | 112.68±70.78    | 0.027    | 108.78±70.76            | 93.12±70.07     | 0.367    |
| LVEF (%)                  | 48.25±12.97             | 45.08±13.07     | 0.031    | 45.84±13.48             | 48.43±12.63     | 0.068    |
| LAD(mm)                   | 41.47±9.10              | 43.92±11.83     | 0.035    | 43.30±10.66             | 41.47±9.72      | 0.105    |
| Medications, n (%)        |                         |                 |          |                         |                 |          |
| Beta-blocker              | 152(58.5%)              | 99(68.8%)       | 0.041    | 130(68.8%)              | 120(56.3%)      | 0.010    |
| CCB                       | 57(21.9%)               | 31(21.5%)       | 0.927    | 43(22.8%)               | 45(21.1%)       | 0.694    |
| Statins                   | 120(46.2%)              | 70(48.6%)       | 0.636    | 92(48.7%)               | 97(45.5%)       | 0.529    |
| ARB                       | 83(31.9%)               | 41(28.5%)       | 0.471    | 63(33.3%)               | 61(28.6%)       | 0.309    |
| ACE-I                     | 74(28.5%)               | 69(47.9%)       | <0.001   | 83(43.9%)               | 59(27.7%)       | 0.001    |

CKD, chronic kidney disease; DCM, idiopathic dilated cardiomyopathy; HCM, hypertrophic cardiomyopathy; HHD, hypertensive heart disease; AF, atrial fibrillation; VHD, valvular heart disease; CHD, coronary heart disease; BNP, B-type natriuretic peptide; IVST, interventricular septum thickness; PWT, posterior wall thickness; LVDv, left ventricular end-diastolic volume; LVSv, left ventricular

end-systolic volume; LVEF, left ventricular ejection fraction; LAD, left atrial dimension; ARB, angiotensin receptor blocker; CCB, calcium-channel blocker; ACE-I, angiotensin converting enzyme inhibitor; AGS, albumin-globulin score; AGR, albumin/globulin ratio.

Table 2. Univariate and multivariate analysis of overall survival

| Variable                         | Univariate analysis |              |         | Multivariate analysis |              |         |
|----------------------------------|---------------------|--------------|---------|-----------------------|--------------|---------|
|                                  | HR                  | 95% CI of HR | P Value | HR                    | 95% CI of HR | P Value |
| Age (per year)                   | 1.02                | (1.01-1.03)  | 0.011   | 1.03                  | (1.01-1.05)  | 0.006   |
| Gender (female vs. male)         | 0.94                | (0.78-1.13)  | 0.501   |                       |              |         |
| Hypertension (yes vs. no)        | 0.95                | (0.66-1.37)  | 0.774   |                       |              |         |
| Diabetes mellitus (yes vs. no)   | 1.27                | (0.87-1.87)  | 0.221   |                       |              |         |
| CKD (yes vs. no)                 | 2.37                | (1.43-3.94)  | 0.001   | 2.13                  | (1.11-4.09)  | 0.023   |
| Prior history of HF (yes vs. no) | 1.27                | (0.85-1.90)  | 0.244   |                       |              |         |
| VHD (yes vs. no)                 | 1.50                | (0.95-2.37)  | 0.079   |                       |              |         |
| CHD (yes vs. no)                 | 0.96                | (0.67-1.37)  | 0.808   |                       |              |         |
| DCM (yes vs. no)                 | 0.63                | (0.37-1.11)  | 0.114   |                       |              |         |
| HCM (yes vs. no)                 | 0.70                | (0.17-2.81)  | 0.610   |                       |              |         |
| HHD (yes vs. no)                 | 0.64                | (0.16-2.60)  | 0.536   |                       |              |         |
| AF (yes vs. no)                  | 1.26                | (0.87-1.84)  | 0.221   |                       |              |         |
| BNP (per 100 pg/mL)              | 1.01                | (1.00-1.02)  | <0.001  | 1.01                  | (1.00-1.02)  | 0.034   |
| LVEF (per 1%)                    | 1.00                | (0.98-1.01)  | 0.623   |                       |              |         |
| IVST (per mm)                    | 1.10                | (0.99-1.21)  | 0.066   |                       |              |         |
| PWT (per mm)                     | 1.09                | (0.99-1.19)  | 0.076   |                       |              |         |
| LVDv (per ml)                    | 1.01                | (1.00-1.02)  | 0.028   | 1.00                  | (0.99-1.01)  | 0.393   |
| LVSv (per ml)                    | 1.01                | (1.00-1.02)  | 0.033   | 1.01                  | (1.00-1.02)  | 0.006   |
| LAD (per mm)                     | 1.02                | (1.01-1.04)  | 0.001   | 1.03                  | (1.01-1.05)  | 0.001   |
| AGR (>1.48 vs. ≤1.48)            | 0.54                | (0.37-0.80)  | 0.001   | 0.61                  | (0.38-0.98)  | 0.040   |
| AGS (0 vs. 1-2)                  | 0.56                | (0.37-0.84)  | 0.005   | 0.81                  | (0.41-1.57)  | 0.525   |

CKD, chronic kidney disease; DCM, idiopathic dilated cardiomyopathy; HCM, hypertrophic cardiomyopathy; HHD, hypertensive heart disease; AF, atrial fibrillation; VHD, valvular heart disease; CHD, coronary heart disease; BNP, B-type natriuretic peptide; IVST, interventricular septum thickness; PWT, posterior wall thickness; LVDv, left ventricular end-diastolic volume; LVSv, left ventricular end-systolic volume; LVEF, left ventricular ejection fraction; LAD, left atrial dimension; AGS, albumin-globulin score; AGR, albumin/globulin ratio

Table 3. Univariate and multivariate analysis of rehospitalization

| Variable                         | Univariate analysis |         | Multivariate analysis |         |
|----------------------------------|---------------------|---------|-----------------------|---------|
|                                  | HR (95% CI)         | P Value | HR (95% CI)           | P Value |
| Age (per year)                   | 1.01 (1.00-1.02)    | 0.009   | 1.01 (1.00-1.02)      | 0.028   |
| Gender (female vs. male)         | 1.01 (1.00-1.02)    | 0.882   |                       |         |
| Hypertension (yes vs. no)        | 1.00 (0.76-1.32)    | 0.998   |                       |         |
| Diabetes mellitus (yes vs. no)   | 1.25 (0.94-1.68)    | 0.130   |                       |         |
| CKD (yes vs. no)                 | 1.68 (1.07-2.62)    | 0.023   | 1.80 (1.07-3.03)      | 0.027   |
| Prior history of HF (yes vs. no) | 1.42 (1.04-1.94)    | 0.028   | 1.30 (0.87-1.95)      | 0.202   |
| VHD (yes vs. no)                 | 1.14 (0.78-1.68)    | 0.490   |                       |         |
| CHD (yes vs. no)                 | 1.26 (0.96-1.65)    | 0.096   |                       |         |
| DCM (yes vs. no)                 | 0.61 (0.33-1.12)    | 0.108   |                       |         |
| HCM (yes vs. no)                 | 1.28 (0.60-2.73)    | 0.523   |                       |         |
| HHD (yes vs. no)                 | 0.77 (0.29-2.08)    | 0.609   |                       |         |
| AF (yes vs. no)                  | 1.11 (0.83-1.47)    | 0.487   |                       |         |
| BNP (per 100 pg/mL)              | 1.01 (1.00-1.02)    | 0.050   | 1.00 (0.99-1.01)      | 0.967   |
| LVEF (per 1%)                    | 1.01 (0.99-1.02)    | 0.187   |                       |         |
| IVST (per mm)                    | 1.09 (1.01-1.17)    | 0.023   | 1.10 (1.00-1.20)      | 0.050   |
| PWT (per mm)                     | 1.04 (0.97-1.13)    | 0.296   |                       |         |
| LVDv (per ml)                    | 1.00 (0.99-1.01)    | 0.967   |                       |         |
| LVSv (per ml)                    | 1.00 (0.99-1.01)    | 0.839   |                       |         |
| LAD (per mm)                     | 1.01 (1.00-1.03)    | 0.041   | 1.02 (1.00-1.03)      | 0.011   |
| AGR (>1.48 vs. ≤1.48)            | 0.92 (0.70-1.22)    | 0.573   |                       |         |
| AGS (0 vs. 1-2)                  | 0.99 (0.75-1.32)    | 0.959   |                       |         |

CKD, chronic kidney disease; DCM, idiopathic dilated cardiomyopathy; HCM, hypertrophic cardiomyopathy; HHD, hypertensive heart disease; AF, atrial fibrillation; VHD, valvular heart disease; CHD, coronary heart disease; BNP, B-type natriuretic peptide; IVST, interventricular septum thickness; PWT, posterior wall thickness; LVDv, left ventricular end-diastolic volume; LVDs, left ventricular end-systolic volume; LVEF, left ventricular ejection fraction; LAD, left atrial dimension; AGS, albumin-globulin score; AGR, albumin/globulin ratio

**Figure legends**

Figure 1. Kaplan–Meier survival curves according to AGR (A) and AGS (B).

Figure 2. Kaplan–Meier hospital free curves according to AGR (A) and AGS (B).

For peer review only

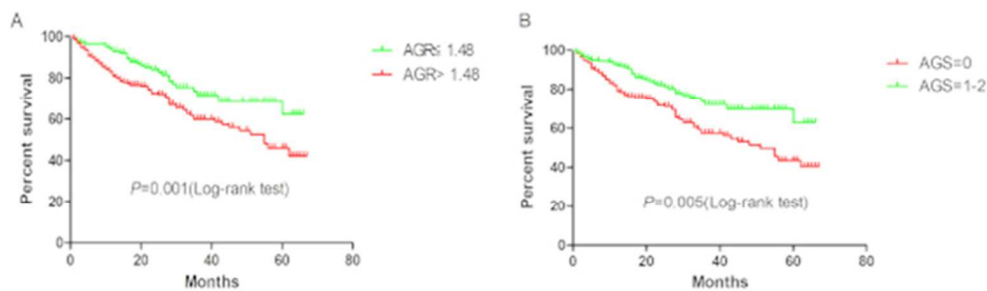

Figure 1. Kaplan-Meier survival curves according to AGR (A) and AGS (B).

62x19mm (300 x 300 DPI)

peer review only



1  
2  
3  
4  
5  
6  
7  
8  
9  
10  
11  
12  
13  
14  
15  
16  
17  
18  
19  
20  
21  
22  
23  
24  
25  
26  
27  
28  
29  
30  
31  
32  
33  
34  
35  
36  
37  
38  
39  
40  
41  
42  
43  
44  
45  
46  
47  
48  
49  
50  
51  
52  
53  
54  
55  
56  
57  
58  
59  
60

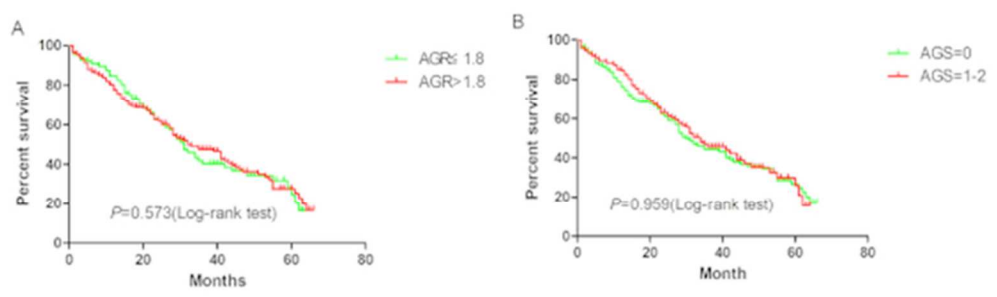

Figure 2. Kaplan–Meier hospital free curves according to AGR (A) and AGS (B).

61x18mm (300 x 300 DPI)

peer review only

# BMJ Open

## The effect of albumin-globulin score and albumin/globulin ratio on survival in patients with heart failure: A retrospective cohort study in China

|                                 |                                                                                                                                                                                                                                                                                                                                                                 |
|---------------------------------|-----------------------------------------------------------------------------------------------------------------------------------------------------------------------------------------------------------------------------------------------------------------------------------------------------------------------------------------------------------------|
| Journal:                        | <i>BMJ Open</i>                                                                                                                                                                                                                                                                                                                                                 |
| Manuscript ID                   | bmjopen-2018-022960.R1                                                                                                                                                                                                                                                                                                                                          |
| Article Type:                   | Research                                                                                                                                                                                                                                                                                                                                                        |
| Date Submitted by the Author:   | 24-Apr-2018                                                                                                                                                                                                                                                                                                                                                     |
| Complete List of Authors:       | Li, Kuan; Henan Provincial People's Hospital, Zhengzhou, Department of Infectious Disease<br>Fu, Wanrong; he First Affiliated Hospital of Zhengzhou University, b. Department of Cardiology<br>Bo, Yacong; Henan Provincial People's Hospital, Zhengzhou, Department of Emergency<br>Zhu, Yongjian; Henan Provincial People's Hospital, Department of Emergency |
| <b>Primary Subject Heading</b>: | Cardiovascular medicine                                                                                                                                                                                                                                                                                                                                         |
| Secondary Subject Heading:      | Epidemiology, Nutrition and metabolism                                                                                                                                                                                                                                                                                                                          |
| Keywords:                       | albumin, globulin, survival, Heart failure < CARDIOLOGY                                                                                                                                                                                                                                                                                                         |
|                                 |                                                                                                                                                                                                                                                                                                                                                                 |

SCHOLARONE™  
Manuscripts

Only

1  
2  
3  
4  
5  
6  
7  
8  
9  
10  
11  
12  
13  
14  
15  
16  
17  
18  
19  
20  
21  
22  
23  
24  
25  
26  
27  
28  
29  
30  
31  
32  
33  
34  
35  
36  
37  
38  
39  
40  
41  
42  
43  
44  
45  
46  
47  
48  
49  
50  
51  
52  
53  
54  
55  
56  
57  
58  
59  
60

# The effect of albumin-globulin score and albumin/globulin ratio on survival in patients with heart failure: A retrospective cohort study in China

Kuan Li<sup>a#</sup>, Wanrong Fu<sup>b</sup>, Yacong Bo<sup>c\*</sup>, Yongjian Zhu<sup>c\*</sup>

- a. Department of Infectious Disease, Henan Provincial People's Hospital, Zhengzhou, China
- b. Department of Cardiology, The First Affiliated Hospital of Zhengzhou University, Zhengzhou, Henan, China
- c. Department of Emergency, Henan Provincial People's Hospital, Zhengzhou, China

Corresponding author: Yongjian Zhu, M.D. Department of Emergency, Henan Provincial People's Hospital, Zhengzhou, China. Email: [zhu412825@126.com](mailto:zhu412825@126.com) Tel: 86+13938404577, Fax: 86+37167781868; Yacong Bo, M.D. Department of Emergency, Henan Provincial People's Hospital, Zhengzhou, China. Email: [boyacong@163.com](mailto:boyacong@163.com) Tel: 86+15639748761, Fax: 86+37167781868;

## Abstracts

**OBJECTIVES:** To investigate the combined effect of albumin (ALB) and globulin (GLB) on the overall survival of patients with heart failure (HF).

**DESIGN:** Retrospective cohort study.

**SETTING:** A Hospital.

**PARTICIPANTS:** 404 firstly diagnosed with heart failure patients.

**MEASUREMENTS:** Serum ALB and GLB were measured within three days after admission. The albumin/globulin ratio (AGR) was calculated as the ALB divided by the GLB. The receiver operating characteristic (ROC) curve was used to calculate the cut-off point of ALB, GLB, and AGR. Patients with low ALB levels ( $\leq 35.3$ g/L) and high GLB levels ( $>27.0$  g/L) were assigned an albumin-globulin score AGS of 2, those with only one of the two abnormalities were assigned an AGS of 1, and those with neither of the two abnormalities were assigned an AGS of 0.

**RESULTS:** The mean age of the 404 patients was  $62.69 \pm 15.62$ , and 54.5% were male. During follow-up, 14 patients lost to follow up. 120 patients died from HF and 211 patients were hospital readmitted for worsening HF. Univariate cox regression analysis showed that higher AGR was significantly associated with favorable overall survival (OS) (HR, 0.61; 95% CI, 0.38-0.98;  $P= 0.040$ ) but not AGS.

1  
2  
3                   **CONCLUSION:** Serum levels of ALB and GLB are objective and  
4 easily measurable biomarkers, which can be used in combination to  
5  
6 predict the survival of patients with HF.  
7  
8

9  
10 **Key words:** albumin; globulin; survival; heart failure  
11  
12

### 13 14 15 16 17 **Strengths and limitations of this study** 18

- 19  
20       • This is the first study investigating the prognostic value of AGS  
21       and AGR in patients with HF.  
22
- 23       • The cohort study design.  
24
- 25       • To avoid bias, only patients firstly diagnosed with heart failure  
26       were selected.  
27
- 28       • The information bias could not be avoided owing to the  
29       retrospective cohort study design.  
30  
31  
32  
33  
34  
35  
36  
37  
38  
39  
40  
41  
42  
43  
44  
45  
46  
47  
48  
49  
50  
51  
52  
53  
54  
55  
56  
57  
58  
59  
60

## Introduction

Heart failure (HF), with a prevalence of more than 23 million worldwide<sup>1 2</sup>, is a global public health problem. In China, there are 4.2 million people living with HF, with 500, 000 new cases diagnosed each year, and this number is expected to increase still further<sup>3</sup>, causing enormous social and economic burden. Over the last 30 years, although great improvements have been made in drug and device therapy, the survival and the rehospitalization rate in HF patients often remains unsatisfactory<sup>4 5</sup>. Hence, identification of promising prognostic factors contributing to the risk classification and clinical management of such patients could improve their long-term survival.

Numerous prognostic markers of death and/or HF hospitalization have been identified in patients with HF. In recent decades, several multivariable prognostic risk scores have been developed for different populations of patients with HF<sup>6-8</sup>. However, their clinical applicability is limited and precise risk stratification in HF remains challenging. Simple but effective prognostic biomarkers model are needed to improve the management of the HF epidemic.

The correlation between serum albumin (ALB) and globulin (GLB) with HF has recently been emphasized. Albumin and globulin, the two major components of serum proteins, have been confirmed to be involved in the systemic inflammatory process. Serum albumin, one of the

1  
2  
3  
4  
5  
6  
7  
8  
9  
10  
11  
12  
13  
14  
15  
16  
17  
18  
19  
20  
21  
22  
23  
24  
25  
26  
27  
28  
29  
30  
31  
32  
33  
34  
35  
36  
37  
38  
39  
40  
41  
42  
43  
44  
45  
46  
47  
48  
49  
50  
51  
52  
53  
54  
55  
56  
57  
58  
59  
60

biochemical tests, not only indicates nutritional status but also relates to chronic inflammation in HF<sup>9 10</sup>. Moreover, increased levels of GLB could serve as markers of chronic inflammation response and reflect a cumulative exposure of various proinflammatory cytokines<sup>11</sup>. Previous studies have demonstrated that hypoalbuminemia was associated with impaired survival in HF patients<sup>12</sup>. However, no study investigated the cumulative effect of ALB and GLB on HF patients. Therefore, the purpose of this present study was to assess the effect of the albumin-globulin score (AGS) and albumin/globulin ratio (AGR) on long-term survival among HF patients.

## Methods and material

### Participants

Between January 2010 and September 2015, 404 consecutive patients who were firstly diagnosed as HF at the First Affiliated Hospital of Zhengzhou University were included. The diagnosis of HF was based on a history of dyspnea with symptomatic exercise intolerance, and signs of documentation of left ventricular enlargement or peripheral edema or pulmonary congestion or radionuclide ventriculography or dysfunction by chest X-ray and/or echocardiography.<sup>13</sup> Informed consent was obtained from all patients prior to participation, and the study was approved by Zhengzhou University Committee. All methods were performed in

1  
2  
3  
4 accordance with the relevant guidelines and regulations.

5  
6 The exclusion criteria for patients were as follows: (1) Acute  
7  
8 coronary syndromes; (2) no echocardiographic structural or functional  
9  
10 abnormalities; (3) without HF; and (4) dead before discharge  
11  
12

### 13 14 **Patient and Public Involvement**

15  
16  
17 All participants were given written informed consent before they  
18  
19 joined the study for authorizing to use the data generated from the  
20  
21 medical information system. The research question and outcome  
22  
23 measures were handed out by hardcopy to each patient. Patients were not  
24  
25 involved in the recruitment and conduct of the study. The results will be  
26  
27 mailed to each participant.  
28  
29  
30  
31

### 32 33 **Clinical and laboratory parameters**

34  
35  
36 Patients' baseline characteristics including demographic parameters,  
37  
38 comorbidities, medications, and laboratory variables were retrospectively  
39  
40 reviewed and collected from the electronic medical records by two  
41  
42 researchers. Fasting venous blood samples were collected from all  
43  
44 patients within three days after admission, and were immediately sent for  
45  
46 analysis. The serum levels of ALB, GLB and other variables were  
47  
48 assayed by using an automatic biochemical analyzer (Hitachi 7600,  
49  
50 Japan). The receiver operating characteristic (ROC) curve was used to  
51  
52  
53  
54  
55  
56  
57



1  
2  
3 calculate the cut-off point of ALB, GLB, and AGR. Patients with low  
4 ALB levels ( $\leq 35.3$ g/L) and high GLB levels ( $>27.0$  g/L) were assigned  
5  
6 an AGS of 2, those with only one of the two abnormalities were assigned  
7  
8 an AGS of 1, and those with neither of the two abnormalities were  
9  
10 assigned an AGS of 0. AGS=1-2 was defined as high, AGS=0 was  
11  
12 defined as low, AGR $> 1.48$  was defined as high, and AGR $\leq 1.48$  was  
13  
14 defined as low. Moreover, AGR was divided into three equal tertiles.  
15  
16  
17  
18  
19  
20

### 21 **Follow-up**

22  
23  
24 All patients were followed-up every 3 months for the first 2 years,  
25  
26 every 6 months in the third, every 1 year afterwards. The primary  
27  
28 endpoint was death due to a cardiovascular event (myocardial infarction,  
29  
30 progressive HF, stroke, other vascular causes, or sudden cardiac death),  
31  
32 the second endpoint was progressive HF requiring re-hospitalization.  
33  
34 Follow-up was performed until patient death, or until July 2016, which  
35  
36 was the cut-off date for this study.  
37  
38  
39  
40  
41  
42

### 43 **Statistical Analysis**

44  
45  
46 The analysis of t-test was used to examine the differences of age,  
47  
48 rank-sum test was used to measure the difference of non-normally  
49  
50 continuous variable [Albumin, B-type natriuretic peptide (BNP),  
51  
52 interventricular septum thickness (IVST), posterior wall thickness (PWT),  
53  
54  
55  
56  
57  
58  
59  
60

1  
2  
3 left ventricular end-diastolic volume (LVDv), left ventricular end-systolic  
4 volume (LVSv), left ventricular ejection fraction (LVEF), and left atrial  
5 dimension (LAD)], and the chi-square test was used to assess the  
6 difference of categorical variables [including gender, Hypertension,  
7 Diabetes mellitus, chronic kidney disease (CKD), Prior history of HF,  
8 idiopathic dilated cardiomyopathy (DCM), hypertrophic cardiomyopathy  
9 (HCM), hypertensive heart disease (HHD), atrial fibrillation (AF), and  
10 Medications]. The Kaplan-Meier method with Log-rank test was used to  
11 estimate survival curves. Univariable cox regression analysis was used to  
12 identify variables associated with overall survival. Variables with a  
13  $P < 0.05$  on univariable analysis were further assessed with a multivariable  
14 Cox regression model. SPSS 21 software (IBM Corp, Armonk, NY) was  
15 used for the statistical analysis. The level of significance was established  
16 as a two-sided  $P$  value 0.05.

## 38 Results

39  
40  
41  
42 The baseline characteristics of patients are presented in table 1. A  
43 total of 404 patients with HF whose mean age was  $62.70 \pm 15.62$  years  
44 old entered the analysis. Among them, 260 patients (64.25%) were  
45 classified as high AGS, 189 patients (46.78%) were classified as higher  
46 AGR. Patients with lower AGS were more often among individuals  
47 without chronic kidney disease (CKD), with idiopathic dilated  
48  
49  
50  
51  
52  
53  
54  
55  
56

1  
2  
3 cardiomyopathy (DCM), using beta-blocker and angiotensin converting  
4 enzyme inhibitor (ACE-I), they also had lower B-type natriuretic peptide  
5 (BNP), higher left ventricular end-systolic volume (LVSv), higher left  
6 ventricular ejection fraction (LVEF), and lower left atrial dimension  
7 (LAD). Patients with higher AGR were more often among individuals  
8 without diabetes mellitus, without coronary heart disease (CHD), with  
9 DCM, using beta-blocker ACE-I, they also had lower B-type natriuretic  
10 peptide (BNP).  
11  
12  
13  
14  
15  
16  
17  
18  
19  
20  
21  
22

23 By July 2016, 404 patients had been followed up. 120 patients died,  
24 211 patients were hospital readmitted, and 14 patients lost to follow up.  
25 The follow-up rate was 96.5%. The mean and median survival times were  
26 47.23 months and 62.00 months, respectively. Figures 1 and 2 showed the  
27 Kaplan-Meier curves of overall survival and hospital free survival  
28 according to AGR ( $>1.48$  vs.  $\leq 1.48$ ) and AGS (0 vs. 1-2), Figure 3  
29 showed the Kaplan-Meier curves of overall survival and hospital free  
30 survival according to AGR tertiles.  
31  
32  
33  
34  
35  
36  
37  
38  
39  
40  
41  
42

43 As shown in table 2, univariate analysis showed that higher AGR  
44 and lower AGS were significantly associated with favorable overall  
45 survival 0.54 (0.37-0.80) and 0.56 (0.37-0.84), respectively. Moreover,  
46 age (per year), CKD (yes vs. no), BNP (per 100 pg/mL), LVDv (per ml),  
47 LVSv (per ml), and LAD (per mm) were other significant prognostic  
48 variables identified by univariate analysis. On multivariate analysis, AGR  
49  
50  
51  
52  
53  
54  
55  
56  
57  
58  
59  
60

1  
2  
3 remained to be an independent predictor for overall survival (HR, 0.61;  
4  
5  
6 95% CI, 0.38-0.98), but not AGS (HR, 0.81; 95% CI, 0.41-1.57).  
7

8  
9 The univariate and multivariate analysis of rehospitalization are  
10 presented in Table 3. Univariate analysis showed that AGR and AGS had  
11 no significant effect on rehospitalization 0.92 (0.70-1.22) and 0.99  
12  
13 (0.75-1.32), respectively. However, age (per year), CKD (yes vs. no),  
14  
15 Prior history of HF (yes vs. no), BNP (per 100 pg/mL), IVST (per mm),  
16  
17 and LAD (per mm) were significant prognostic variables for  
18  
19 rehospitalization. On multivariate analysis, age (per year), CKD (yes vs.  
20  
21 no), IVST (per mm), and LAD (per mm) were independent prognostic  
22  
23 indicator for rehospitalization.  
24  
25  
26  
27  
28  
29  
30

## 31 **Discussion**

32  
33  
34 This study demonstrated that the combination of ALB and GLB have  
35 potential predictive effect on predicting survival in patients with HF,  
36  
37 higher AGR was significantly associated with favorable overall survival  
38  
39 among patients with HF. To the best of our knowledge, this is the first  
40  
41 study investigating the prognostic value of AGS and AGR in patients with  
42  
43 HF.  
44  
45  
46  
47  
48

49 The prediction of HF prognosis is a cornerstone of HF management.  
50  
51 Accurately predicting prognosis can be of benefit for patients with heart  
52  
53 failure. Patients with a poor prognosis might benefit more from  
54  
55  
56  
57  
58  
59  
60

1  
2  
3 aggressive treatment and a closer follow-up<sup>14</sup>. There exist previous risk  
4 models for patients with HF<sup>15 16</sup>, which adopted a systems biology  
5 approach, by incorporating information from demographic, biomarker,  
6 genomic, proteomic, and the initial response to therapy might create a  
7 more effective prediction model and hopefully aid in understanding HF  
8 prognosis. However, these models are complex in clinical application and  
9 just provide moderate accuracy prediction in survival and  
10 rehospitalization in patients with HF<sup>17</sup>. Hence, designing a simple  
11 survival model based on routine blood biochemical indexes for clinician  
12 is helpful for better identification high risk HF patients.  
13  
14  
15  
16  
17  
18  
19  
20  
21  
22  
23  
24  
25  
26  
27

28 The role of serum albumin is complex. Serum albumin is  
29 synthesized in the liver and plays multiple physiological roles, including  
30 maintenance of pH and normal microvascular permeability and mediation  
31 of coagulation, and has antioxidant properties<sup>18</sup>. The decrease in plasma  
32 albumin concentration may be due to malnutrition and cachexia  
33 (decreased albumin intake)<sup>19</sup>, diffuse inflammation (increased albumin  
34 consumption)<sup>20</sup>, renal impairment (increased urinary albumin loss)<sup>21</sup>,  
35 plasma volume expansion (dilutional hypoalbuminemia), and hepatic  
36 dysfunction (decreased albumin synthesis)<sup>22 23</sup>. Serum albumin is used in  
37 assessing protein malnutrition without calorie malnutrition in which  
38 serum albumin becomes low without affection of anthropometric  
39 measurements<sup>24</sup>. Malnutrition was found to be associated with worsening  
40  
41  
42  
43  
44  
45  
46  
47  
48  
49  
50  
51  
52  
53  
54  
55  
56  
57  
58  
59  
60

1  
2  
3 of symptoms and poor prognosis. Multiple European studies showed  
4 malnourished heart failure patients are weaker and fatigue earlier<sup>25 26</sup>.  
5  
6 Heart failure with hypoalbuminemia, the indicator of malnutrition, was  
7  
8 found to be associated with higher New York heart association (NYHA)  
9  
10 functional class, elevated serum blood urea nitrogen and C-reactive  
11  
12 protein<sup>24</sup>. It should be noted that although hypoalbuminemia might reflect  
13  
14 poor nutritional status, albumin reduction in chronic inflammation  
15  
16 is frequent<sup>11</sup>.  
17  
18  
19  
20  
21  
22

23 Similar to the low albumin, high non-albumin protein was a  
24  
25 predictor of mortality in HF patients. We postulate that the high serum  
26  
27 non-albumin proteins status is a marker of inflammation in HF patients.  
28  
29 Chronic inflammation is known to increase acute-phase proteins [eg,  
30  
31 C-reactive protein (CRP), serum amyloid A, complement C3, fibrinogen,  
32  
33 ceruloplasmin], which constitute part of the calculated globulins<sup>11</sup>. And  
34  
35 the increased level of globulin serves as a marker of chronic  
36  
37 inflammation and reflects cumulative exposure to various  
38  
39 pro-inflammatory cytokines such as interleukins (IL), particularly IL-6  
40  
41 and IL-1b, and tumor necrosis factor-a, which stimulates the production  
42  
43 of acute-phase proteins<sup>11</sup>. Chronic inflammation is a critical contributor to  
44  
45 HF occurrence, development, survival, and is also related to the risk of  
46  
47 recurrence among HF patients<sup>27</sup>. Hence, we propose that low AGR and  
48  
49 high AGS measure the extent of such activities related to chronic  
50  
51  
52  
53  
54  
55  
56  
57  
58  
59  
60

1  
2  
3 inflammation, which influence mortality.  
4

5  
6 What's more, we found that LAD was a significant independent  
7  
8 predictor for the long-term survival and rehospitalization in HF patients.  
9  
10 The result is consistent with previous research findings<sup>28</sup>. As a predictor  
11  
12 reflecting left atrium (LA) structural remodeling, LAD relates to all key  
13  
14 risk factors for AF, such as advancing age, male sex, and greater blood  
15  
16 pressure<sup>29</sup>. LA enlargement, as characterized by echocardiographic LAD,  
17  
18 is related to incident AF, heart failure, stroke, and mortality<sup>28 30-33</sup>.  
19  
20 Moreover, LA enlargement can reflect atrial volume or pressure overload  
21  
22 in valvular or ischemic heart disease, or as a consequence of AF<sup>34-36</sup>.  
23  
24  
25  
26

27  
28 Prior studies have demonstrated that low serum albumin is an  
29  
30 independent predictor of HF long-term mortality. Liu et.al showed that  
31  
32 patients with hypoalbuminemia had a significantly lower survival rate (53%  
33  
34 vs. 84%, log-rank  $\chi(2) = 53.3$ ,  $P < 0.001$ ) and a higher rate of  
35  
36 cardiovascular death (21.8% vs. 8.9% ,  $P < 0.001$ )<sup>37</sup>. Su et.al. reported  
37  
38 that the patients with higher NT-pro BNP and lower albumin than median  
39  
40 had the highest risk for cardiac events (HR, 2.89, CI 1.90-4.40,<sup>38</sup>). The  
41  
42 finding of our study that AGR is independent predictor of long-term  
43  
44 mortality in HF patients was consistent with previous studies.  
45  
46  
47  
48  
49  
50

## 51 **Conclusions**

52  
53

54 In conclusion, the present study suggests that the AGR is convenient  
55  
56

1  
2  
3 and effective tool to predict the overall survival time in HF patients.  
4  
5  
6 Further larger prospective studies are required to validate this finding and  
7  
8 to investigate other prognostic indicators in HF patients.  
9

## 10 11 12 **Authors' contributions**

13  
14  
15  
16 Kuan Li and Yongjian Zhu designed the study and provided critical review of the  
17  
18 manuscript. Yongjian Zhu, Yacong Bo and Wanrong Fu reviewed the literature.  
19  
20 Yongjian Zhu and Kuan Li analyzed the data and wrote the first draft of the  
21  
22 manuscript. Yacong Bo, Wanrong Fu, and Yongjian Zhu revised the manuscript.  
23  
24  
25

## 26 27 **Funding**

28  
29  
30 None  
31  
32  
33

## 34 35 **Competing interests**

36  
37  
38 The authors declare that they have no conflict of interests.  
39  
40  
41

## 42 43 **Data sharing statement**

44  
45  
46 Additional data are available from Yongjian Zhu for reasonable requesting.  
47  
48  
49

## 50 51 **Ethics approval**

52  
53 The study was approved by Ethics Research Committee in Zhengzhou  
54  
55 University.  
56  
57



1  
2  
3  
4  
5  
6  
7  
8  
9  
10  
11  
12  
13  
14  
15  
16  
17  
18  
19  
20  
21  
22  
23  
24  
25  
26  
27  
28  
29  
30  
31  
32  
33  
34  
35  
36  
37  
38  
39  
40  
41  
42  
43  
44  
45  
46  
47  
48  
49  
50  
51  
52  
53  
54  
55  
56  
57  
58  
59  
60

For peer review only

## Reference

1. Mosterd A, Hoes AW (2007) Clinical epidemiology of heart failure. *Heart (British Cardiac Society)* **93**, 1137-1146. doi: 10.1136/hrt.2003.025270
2. Roger VL (2013) Epidemiology of heart failure. *Circulation research* **113**, 646-659. doi: 10.1161/CIRCRESAHA.113.300268
3. Lam CS, Teng TK, Tay WT *et al.* (2016) Regional and ethnic differences among patients with heart failure in Asia: the Asian sudden cardiac death in heart failure registry. *European heart journal*. **37**, 3141-3153. doi: 10.1093/eurheartj/ehw331
4. Maggioni AP, Dahlstrom U, Filippatos G *et al.* (2013) EURObservational Research Programme: regional differences and 1-year follow-up results of the Heart Failure Pilot Survey (ESC-HF Pilot). *European journal of heart failure* **15**, 808-817. doi: 10.1093/eurjhf/hft050
5. Tsuchihashi-Makaya M, Hamaguchi S, Kinugawa S *et al.* (2009) Characteristics and outcomes of hospitalized patients with heart failure and reduced vs preserved ejection fraction. Report from the Japanese Cardiac Registry of Heart Failure in Cardiology (JCARE-CARD). *Circulation journal : official journal of the Japanese Circulation Society* **73**, 1893-1900. doi: 10.1253/circj.CJ-09-0254
6. Lupon J, de Antonio M, Vila J *et al.* (2014) Development of a novel heart failure risk tool: the barcelona bio-heart failure risk calculator (BCN bio-HF calculator). *PloS one* **9**, e85466. doi: 10.1371/journal.pone.0085466
7. Levy WC, Mozaffarian D, Linker DT *et al.* (2006) The Seattle Heart Failure Model: prediction of survival in heart failure. *Circulation* **113**, 1424-1433. doi: 10.1161/CIRCULATIONAHA.105.584102
8. Mozaffarian D, Anker SD, Anand I *et al.* (2007) Prediction of mode of death in heart failure: the Seattle Heart Failure Model. *Circulation* **116**, 392-398. doi: 10.1161/CIRCULATIONAHA.106.687103
9. Gopal DM, Kalogeropoulos AP, Georgiopoulou VV *et al.* (2010) Serum albumin concentration and heart failure risk The Health, Aging, and Body Composition Study. *American heart journal* **160**, 279-285. doi: 10.1016/j.ahj.2010.05.022
10. Horwich TB, Kalantar-Zadeh K, MacLellan RW *et al.* (2008) Albumin levels predict survival in patients with systolic heart failure. *American heart journal* **155**, 883-889. doi: 10.1016/j.ahj.2007.11.043
11. Gabay C1, Kushner I. (1991) Acute-Phase Proteins and Other Systemic Responses to Inflammation. *The New England journal of medicine* **340**, 448-454. doi: 10.1056/NEJM199902113400607
12. Grodin JL, Lala A, Stevens SR *et al.* (2016) Clinical Implications of Serum Albumin Levels in Acute Heart Failure: Insights From DOSE-AHF and ROSE-AHF. *Journal of cardiac failure*. doi: 10.1016/j.cardfail.2016.01.015
13. Fu T, Bu ZD, Li ZY *et al.* (2015) Neoadjuvant chemoradiation therapy for resectable esophago-gastric adenocarcinoma: a meta-analysis of randomized clinical trials. *BMC cancer* **15**, 322. doi: 10.1186/s12885-015-1341-7
14. Ouwerkerk W, Voors AA, Zwinderman AH (2014) Factors influencing the predictive power of models for predicting mortality and/or heart failure hospitalization in patients with heart failure. *JACC Heart failure* **2**, 429-436. doi: 10.1016/j.jchf.2014.04.006.
15. Giamouzis G, Kalogeropoulos A, Georgiopoulou V *et al.* (2011) Hospitalization epidemic in patients with heart failure: risk factors, risk prediction, knowledge gaps, and future directions. *Journal of cardiac failure* **17**, 54-75. doi: 10.1016/j.cardfail.2010.08.010.

16. Betihavas V, Davidson PM, Newton PJ *et al.* (2012) What are the factors in risk prediction models for rehospitalisation for adults with chronic heart failure? *Australian critical care : official journal of the Confederation of Australian Critical Care Nurses* **25**, 31-40. doi: 10.1016/j.aucc.2011.07.004.
17. Rahimi K, Bennett D, Conrad N *et al.* (2014) Risk prediction in patients with heart failure: a systematic review and analysis. *JACC Heart failure* **2**, 440-446. doi: 10.1016/j.jchf.2014.04.008.
18. Roche M, Rondeau P, Singh NR *et al.* (2008) The antioxidant properties of serum albumin. *FEBS letters* **582**, 1783-1787. doi: 10.1016/j.febslet.2008.04.057.
19. Lourenco BH, Vieira LP, Macedo A *et al.* (2009) Nutritional status and adequacy of energy and nutrient intakes among heart failure patients. *Arquivos brasileiros de cardiologia* **93**, 541-548.
20. Wrigley BJ, Lip GY, Shantsila E (2011) The role of monocytes and inflammation in the pathophysiology of heart failure. *European journal of heart failure* **13**, 1161-1171. doi: 10.1093/eurjhf/hfr122.
21. Zamora E, Lupon J, Vila J *et al.* (2012) Estimated glomerular filtration rate and prognosis in heart failure: value of the Modification of Diet in Renal Disease Study-4, chronic kidney disease epidemiology collaboration, and cockcroft-gault formulas. *Journal of the American College of Cardiology* **59**, 1709-1715. doi: 10.1016/j.jacc.2011.11.066.
22. Adlbrecht C, Kommata S, Hulsmann M *et al.* (2008) Chronic heart failure leads to an expanded plasma volume and pseudoanaemia, but does not lead to a reduction in the body's red cell volume. *European heart journal* **29**, 2343-2350. doi: 10.1093/eurheartj/ehn359.
23. Herzer K, Kneiseler G, Bechmann LP *et al.* (2011) Onset of heart failure determines the hepatic cell death pattern. *Annals of hepatology* **10**, 174-179.
24. Amare H, Hamza L, Asefa H (2015) Malnutrition and associated factors among heart failure patients on follow up at Jimma university specialized hospital, Ethiopia. *BMC cardiovascular disorders* **15**, 128. doi: 10.1186/s12872-015-0111-4.
25. Jacobsson A, Pihl-Lindgren E, Fridlund B (2001) Malnutrition in patients suffering from chronic heart failure; the nurse's care. *European journal of heart failure* **3**, 449-456. doi: 10.1016/S1388-9842(01)00139-8
26. Anker SD, Steinborn W, Strassburg S (2004) Cardiac cachexia. *Annals of medicine* **36**, 518-529. doi: 10.1080/07853890410017467
27. Dick SA, Epelman S (2016) Chronic Heart Failure and Inflammation: What Do We Really Know? *Circulation research* **119**, 159-176. doi: 10.1161/CIRCRESAHA.116.308030.
28. Ristow B, Ali S, Whooley MA *et al.* (2008) Usefulness of left atrial volume index to predict heart failure hospitalization and mortality in ambulatory patients with coronary heart disease and comparison to left ventricular ejection fraction (from the Heart and Soul Study). *The American journal of cardiology* **102**, 70-76. doi: 10.1016/j.amjcard.2008.02.099.
29. McManus DD, Yin X, Gladstone R *et al.* (2016) Alcohol Consumption, Left Atrial Diameter, and Atrial Fibrillation. *Journal of the American Heart Association* **5**. doi: 10.1161/JAHA.116.004060.
30. McManus DD, Xanthakis V, Sullivan LM *et al.* (2010) Longitudinal tracking of left atrial diameter over the adult life course: Clinical correlates in the community. *Circulation* **121**, 667-674. doi: 10.1161/CIRCULATIONAHA.
31. Vaziri SM, Larson MG, Benjamin EJ *et al.* (1994) Echocardiographic predictors of nonrheumatic atrial fibrillation. The Framingham Heart Study. *Circulation* **89**, 724-730. doi: 10.1161/01.CIR.89.2.724
32. Kizer JR, Bella JN, Palmieri V *et al.* (2006) Left atrial diameter as an independent predictor of first clinical cardiovascular events in middle-aged and elderly adults: the Strong Heart Study (SHS).

1  
2  
3 *American heart journal* **151**, 412-418. doi: 10.1016/j.ahj.2005.04.031

4 33. Benjamin EJ, D'Agostino RB, Belanger AJ *et al.* (1995) Left atrial size and the risk of stroke and  
5 death. The Framingham Heart Study. *Circulation* **92**, 835-841. doi: 10.1161/01.CIR.89.2.724

6 34. Sanfilippo AJ, Abascal VM, Sheehan M *et al.* (1990) Atrial enlargement as a consequence of atrial  
7 fibrillation. A prospective echocardiographic study. *Circulation* **82**, 792-797. doi:  
8 10.1161/01.CIR.82.3.792

9 35. Abhayaratna WP, Seward JB, Appleton CP *et al.* (2006) Left atrial size: physiologic determinants  
10 and clinical applications. *Journal of the American College of Cardiology* **47**, 2357-2363. doi:  
11 10.1016/j.jacc.2006.02.048

12 36. Pritchett AM, Mahoney DW, Jacobsen SJ *et al.* (2005) Diastolic dysfunction and left atrial volume: a  
13 population-based study. *Journal of the American College of Cardiology* **45**, 87-92. doi:  
14 10.1016/j.jacc.2004.09.054

15 37. Liu M, Chan CP, Yan BP *et al.* (2012) Albumin levels predict survival in patients with heart failure  
16 and preserved ejection fraction. *European journal of heart failure* **14**, 39-44. doi:  
17 10.1093/eurjhf/hfr154.

18 38. Su W, An T, Zhou Q *et al.* (2012) Serum albumin is a useful prognostic indicator and adds  
19 important information to NT-proBNP in a Chinese cohort of heart failure. *Clinical biochemistry* **45**,  
20 561-565. doi: 10.1016/j.clinbiochem.

## Tables

Table 1 Correlation between AGS, AGR, and clinicopathologic parameters in 404 chronic heart failure patients

| Variables                 | AGS (High=260, Low=144) |                       |          | AGR (High=189, Low=215) |                       |          |
|---------------------------|-------------------------|-----------------------|----------|-------------------------|-----------------------|----------|
|                           | High (1-2)              | Low (0)               | <i>P</i> | High (>1.48)            | Low ( $\leq$ 1.48)    | <i>P</i> |
| Age (years)               | 63.82±15.63             | 60.67±15.45           | 0.051    | 59.46±15.34             | 65.41±15.34           | <0.001   |
| Gender                    |                         |                       |          |                         |                       |          |
| Male                      | 133(51.2%)              | 87 (60.4%)            | 0.073    | 111(58.7%)              | 109(51.2%)            | 0.129    |
| Albumin(g/dl)             | 37.8(26.8-47.1)         | 36.0(24.2-45.1)       | 0.026    | 36.3(26.1-46.3)         | 38.2(25.7-47.5)       | 0.017    |
| Hypertension              | 107(41.2%)              | 59(41.0%)             | 0.972    | 78(41.3%)               | 88(41.3%)             | 0.993    |
| Diabetes mellitus         | 80(30.8%)               | 32(22.2%)             | 0.066    | 42(22.2%)               | 70(32.9%)             | 0.018    |
| CKD                       | 32(12.3%)               | 7(4.9%)               | 0.015    | 16(8.5%)                | 23(10.8%)             | 0.430    |
| Prior history of HF       | 185(71.2%)              | 110(76.4%)            | 0.256    | 145(76.7%)              | 148(69.5%)            | 0.103    |
| VHD                       | 35(13.5%)               | 18(12.5%)             | 0.784    | 24(12.7%)               | 29(13.6%)             | 0.786    |
| CHD                       | 118(45.4%)              | 68(47.2%)             | 0.723    | 75(39.7%)               | 110(51.6%)            | 0.016    |
| DCM                       | 39(15.0%)               | 33(22.9%)             | 0.046    | 47(24.9%)               | 25(11.7%)             | 0.001    |
| HCM                       | 7(2.7%)                 | 2(1.4%)               | 0.395    | 5(2.6%)                 | 4(1.9%)               | 0.604    |
| HHD                       | 5(1.9%)                 | 5(3.5%)               | 0.337    | 5(2.6%)                 | 5(2.3%)               | 0.848    |
| AF                        | 81(31.2%)               | 40(27.8%)             | 0.478    | 60(31.7%)               | 60(28.2%)             | 0.434    |
| BNP (pg/mL)               | 3948.5(500.7-18807.6)   | 2643.0(409.6-12089.1) | <0.001   | 2881.0(532.4-20725.8)   | 4155.5(445.2-17685.2) | <0.001   |
| Echocardiography findings |                         |                       |          |                         |                       |          |

| Variables          | AGS (High=260, Low=144) |                   |          | AGR (High=189, Low=215) |                    |          |
|--------------------|-------------------------|-------------------|----------|-------------------------|--------------------|----------|
|                    | High (1-2)              | Low (0)           | <i>P</i> | High (>1.48)            | Low ( $\leq$ 1.48) | <i>P</i> |
| IVST (mm)          | 10.0(7.8-13.0)          | 9.7(8.0-13.4)     | 0.027    | 10.0(8.0-14.0)          | 10.0(7.7-13.0)     | 0.813    |
| PWT (mm)           | 9.0(8.0-12.0)           | 9.0(7.2-12.9)     | 0.172    | 9.0(2.2-12.8)           | 9.0(8.0-11.0)      | 0.423    |
| LVDv (ml)          | 152.0(71.6-347.6)       | 170.0(72.6-346.0) | 0.014    | 150.5(72.0-365.7)       | 170.0(67.8-343.2)  | 0.023    |
| LVSv (ml)          | 75.5(27.0-225.6)        | 98.0(27.0-232.1)  | 0.007    | 95.0(26.4-230.0)        | 74.5(27.0-231.1)   | 0.019    |
| LVEF (%)           | 48.0(28.0-67.5)         | 45.0(27.0-64.0)   | 0.031    | 45.0(27.0-65.0)         | 48.0(28.0-67.0)    | 0.086    |
| LAD(mm)            | 40.0(29.0-58.4)         | 42.0(28.3-63.7)   | 0.047    | 42.0(29.4-62.2)         | 39.0(29.0-60.6)    | 0.032    |
| Medications, n (%) |                         |                   |          |                         |                    |          |
| Beta-blocker       | 152(58.5%)              | 99(68.8%)         | 0.041    | 130(68.8%)              | 120(56.3%)         | 0.010    |
| CCB                | 57(21.9%)               | 31(21.5%)         | 0.927    | 43(22.8%)               | 45(21.1%)          | 0.694    |
| Statins            | 120(46.2%)              | 70(48.6%)         | 0.636    | 92(48.7%)               | 97(45.5%)          | 0.529    |
| ARB                | 83(31.9%)               | 41(28.5%)         | 0.471    | 63(33.3%)               | 61(28.6%)          | 0.309    |
| ACE-I              | 74(28.5%)               | 69(47.9%)         | <0.001   | 83(43.9%)               | 59(27.7%)          | 0.001    |

CKD, chronic kidney disease; DCM, idiopathic dilated cardiomyopathy; HCM, hypertrophic cardiomyopathy; HHD, hypertensive heart disease; AF, atrial fibrillation; VHD, valvular heart disease; CHD, coronary heart disease; BNP, B-type natriuretic peptide; IVST, interventricular septum thickness; PWT, posterior wall thickness; LVDv, left ventricular end-diastolic volume; LVSv, left ventricular end-systolic volume; LVEF, left ventricular ejection fraction; LAD, left atrial dimension; ARB, angiotensin receptor blocker; CCB, calcium-channel blocker; ACE-I, angiotensin converting enzyme inhibitor; AGS, albumin-globulin score; AGR, albumin/globulin ratio.

Table 2. Univariate and multivariate analysis of overall survival

| Variable                         | Univariate analysis |              |         | Multivariate analysis |              |         |
|----------------------------------|---------------------|--------------|---------|-----------------------|--------------|---------|
|                                  | HR                  | 95% CI of HR | P Value | HR                    | 95% CI of HR | P Value |
| Age (per year)                   | 1.02                | (1.01-1.03)  | 0.011   | 1.03                  | (1.01-1.05)  | 0.006   |
| Gender (female vs. male)         | 0.94                | (0.78-1.13)  | 0.501   |                       |              |         |
| Hypertension (yes vs. no)        | 0.95                | (0.66-1.37)  | 0.774   |                       |              |         |
| Diabetes mellitus (yes vs. no)   | 1.27                | (0.87-1.87)  | 0.221   |                       |              |         |
| CKD (yes vs. no)                 | 2.37                | (1.43-3.94)  | 0.001   | 2.13                  | (1.11-4.09)  | 0.023   |
| Prior history of HF (yes vs. no) | 1.27                | (0.85-1.90)  | 0.244   |                       |              |         |
| VHD (yes vs. no)                 | 1.50                | (0.95-2.37)  | 0.079   |                       |              |         |
| CHD (yes vs. no)                 | 0.96                | (0.67-1.37)  | 0.808   |                       |              |         |
| DCM (yes vs. no)                 | 0.63                | (0.37-1.11)  | 0.114   |                       |              |         |
| HCM (yes vs. no)                 | 0.70                | (0.17-2.81)  | 0.610   |                       |              |         |
| HHD (yes vs. no)                 | 0.64                | (0.16-2.60)  | 0.536   |                       |              |         |
| AF (yes vs. no)                  | 1.26                | (0.87-1.84)  | 0.221   |                       |              |         |
| BNP (per 100 pg/mL)              | 1.01                | (1.00-1.02)  | <0.001  | 1.01                  | (1.00-1.02)  | 0.034   |
| LVEF (per 1%)                    | 1.00                | (0.98-1.01)  | 0.623   |                       |              |         |
| IVST (per mm)                    | 1.10                | (0.99-1.21)  | 0.066   |                       |              |         |
| PWT (per mm)                     | 1.09                | (0.99-1.19)  | 0.076   |                       |              |         |
| LVDv (per ml)                    | 1.01                | (1.00-1.02)  | 0.028   | 1.00                  | (0.99-1.01)  | 0.393   |
| LVSv (per ml)                    | 1.01                | (1.00-1.02)  | 0.033   | 1.01                  | (1.00-1.02)  | 0.006   |
| LAD (per mm)                     | 1.02                | (1.01-1.04)  | 0.001   | 1.03                  | (1.01-1.05)  | 0.001   |
| AGR (>1.48 vs. ≤1.48)            | 0.54                | (0.37-0.80)  | 0.001   | 0.61                  | (0.38-0.98)  | 0.040   |
| AGR ((ref: 1st tertile))         |                     |              |         |                       |              |         |
| AGR 2nd tertile                  | 0.84                | (0.55-1.28)  | 0.412   | 0.82                  | (0.54-1.25)  | 0.350   |
| AGR 3rd tertile                  | 0.56                | (0.36-0.89)  | 0.014   | 0.62                  | (0.39-0.98)  | 0.040   |
| AGS (0 vs. 1-2)                  | 0.56                | (0.37-0.84)  | 0.005   | 0.81                  | (0.41-1.57)  | 0.525   |

CKD, chronic kidney disease; DCM, idiopathic dilated cardiomyopathy; HCM, hypertrophic cardiomyopathy; HHD, hypertensive heart disease; AF, atrial fibrillation; VHD, valvular heart disease; CHD, coronary heart disease; BNP, B-type natriuretic peptide; IVST, interventricular septum thickness; PWT, posterior wall thickness; LVDv, left ventricular end-diastolic volume; LVSv, left ventricular end-systolic volume; LVEF, left ventricular ejection fraction; LAD, left atrial dimension; AGS, albumin-globulin score; AGR, albumin/globulin ratio

Table 3. Univariate and multivariate analysis of rehospitalization

| Variable                         | Univariate analysis |         | Multivariate analysis |         |
|----------------------------------|---------------------|---------|-----------------------|---------|
|                                  | HR (95% CI)         | P Value | HR (95% CI)           | P Value |
| Age (per year)                   | 1.01 (1.00-1.02)    | 0.009   | 1.01 (1.00-1.02)      | 0.028   |
| Gender (female vs. male)         | 1.01 (1.00-1.02)    | 0.882   |                       |         |
| Hypertension (yes vs. no)        | 1.00 (0.76-1.32)    | 0.998   |                       |         |
| Diabetes mellitus (yes vs. no)   | 1.25 (0.94-1.68)    | 0.130   |                       |         |
| CKD (yes vs. no)                 | 1.68 (1.07-2.62)    | 0.023   | 1.80 (1.07-3.03)      | 0.027   |
| Prior history of HF (yes vs. no) | 1.42 (1.04-1.94)    | 0.028   | 1.30 (0.87-1.95)      | 0.202   |
| VHD (yes vs. no)                 | 1.14 (0.78-1.68)    | 0.490   |                       |         |
| CHD (yes vs. no)                 | 1.26 (0.96-1.65)    | 0.096   |                       |         |
| DCM (yes vs. no)                 | 0.61 (0.33-1.12)    | 0.108   |                       |         |
| HCM (yes vs. no)                 | 1.28 (0.60-2.73)    | 0.523   |                       |         |
| HHD (yes vs. no)                 | 0.77 (0.29-2.08)    | 0.609   |                       |         |
| AF (yes vs. no)                  | 1.11 (0.83-1.47)    | 0.487   |                       |         |
| BNP (per 100 pg/mL)              | 1.01 (1.00-1.02)    | 0.050   | 1.00 (0.99-1.01)      | 0.967   |
| LVEF (per 1%)                    | 1.01 (0.99-1.02)    | 0.187   |                       |         |
| IVST (per mm)                    | 1.09 (1.01-1.17)    | 0.023   | 1.10 (1.00-1.20)      | 0.050   |
| PWT (per mm)                     | 1.04 (0.97-1.13)    | 0.296   |                       |         |
| LVDv (per ml)                    | 1.00 (0.99-1.01)    | 0.967   |                       |         |
| LVSv (per ml)                    | 1.00 (0.99-1.01)    | 0.839   |                       |         |
| LAD (per mm)                     | 1.01 (1.00-1.03)    | 0.041   | 1.02 (1.00-1.03)      | 0.011   |
| AGR (>1.48 vs. ≤1.48)            | 0.92 (0.70-1.22)    | 0.573   |                       |         |
| AGR ((ref: 1ST tertile))         |                     |         |                       |         |
| AGR 2nd tertile                  | 1.14 (0.82-1.58)    | 0.448   |                       |         |
| AGR 3rd tertile                  | 0.97 (0.69-1.36)    | 0.850   |                       |         |
| AGS (0 vs. 1-2)                  | 0.99 (0.75-1.32)    | 0.959   |                       |         |

CKD, chronic kidney disease; DCM, idiopathic dilated cardiomyopathy; HCM, hypertrophic cardiomyopathy; HHD, hypertensive heart disease; AF, atrial fibrillation; VHD, valvular heart disease; CHD, coronary heart disease; BNP, B-type natriuretic peptide; IVST, interventricular septum thickness; PWT, posterior wall thickness; LVDv, left ventricular end-diastolic volume; LVDs, left ventricular end-systolic volume; LVEF, left ventricular ejection fraction; LAD, left atrial dimension; AGS, albumin-globulin score; AGR, albumin/globulin ratio



## Figure legends

Figure 1. Kaplan–Meier survival curves according to AGR (A) and AGS (B).

Figure 2. Kaplan–Meier hospital free curves according to AGR (A) and AGS (B).

Figure 3. Kaplan–Meier survival (A) and hospital free curves (B) according to AGR tertiles.

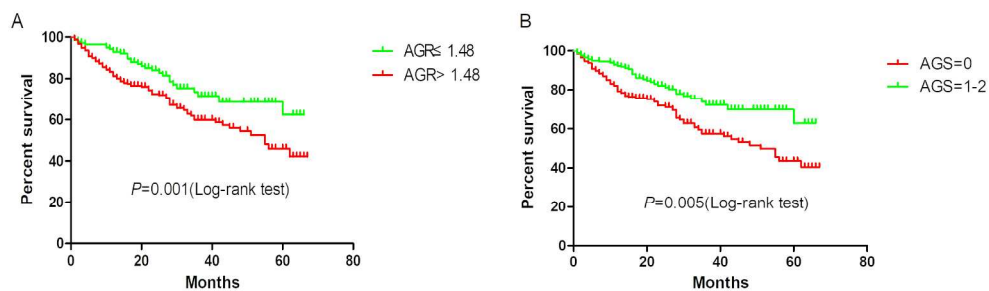

Figure 1. Kaplan-Meier survival curves according to AGR (A) and AGS (B).

289x90mm (300 x 300 DPI)

peer review only

1  
2  
3  
4  
5  
6  
7  
8  
9  
10  
11  
12  
13  
14  
15  
16  
17  
18  
19  
20  
21  
22  
23  
24  
25  
26  
27  
28  
29  
30  
31  
32  
33  
34  
35  
36  
37  
38  
39  
40  
41  
42  
43  
44  
45  
46  
47  
48  
49  
50  
51  
52  
53  
54  
55  
56  
57  
58  
59  
60

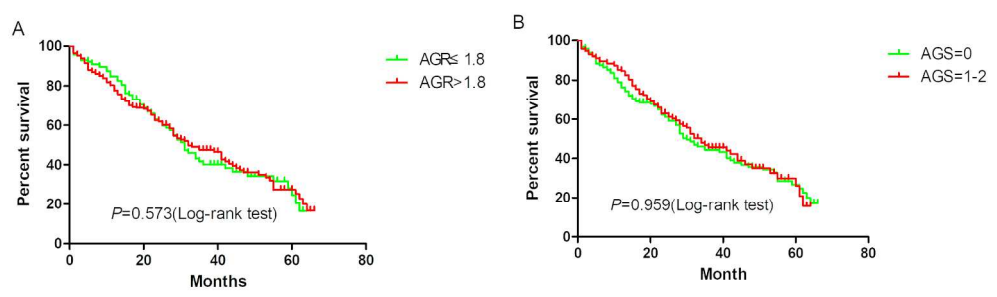

Figure 2. Kaplan–Meier hospital free curves according to AGR (A) and AGS (B).

293x90mm (300 x 300 DPI)

peer review only

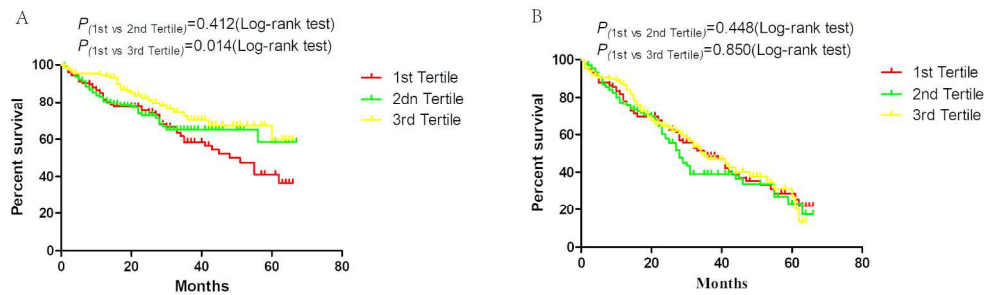

Figure 3. Kaplan-Meier survival (A) and hospital free curves (B) according to AGR tertiles.

293x90mm (300 x 300 DPI)

peer review only

**STROBE 2007 (v4) checklist of items to be included in reports of observational studies in epidemiology\***  
**Checklist for cohort, case-control, and cross-sectional studies (combined)**

| Section/Topic             | Item # | Recommendation                                                                                                                                                                                                                                                                                                                                                                                                                                                         | Reported on page # |
|---------------------------|--------|------------------------------------------------------------------------------------------------------------------------------------------------------------------------------------------------------------------------------------------------------------------------------------------------------------------------------------------------------------------------------------------------------------------------------------------------------------------------|--------------------|
| Title and abstract        | 1      | (a) Indicate the study’s design with a commonly used term in the title or the abstract                                                                                                                                                                                                                                                                                                                                                                                 | Page 1             |
|                           |        | (b) Provide in the abstract an informative and balanced summary of what was done and what was found                                                                                                                                                                                                                                                                                                                                                                    | Page 2             |
| <b>Introduction</b>       |        |                                                                                                                                                                                                                                                                                                                                                                                                                                                                        |                    |
| Background/rationale      | 2      | Explain the scientific background and rationale for the investigation being reported                                                                                                                                                                                                                                                                                                                                                                                   | Page4-5            |
| Objectives                | 3      | State specific objectives, including any pre-specified hypotheses                                                                                                                                                                                                                                                                                                                                                                                                      | Page5              |
| <b>Methods</b>            |        |                                                                                                                                                                                                                                                                                                                                                                                                                                                                        |                    |
| Study design              | 4      | Present key elements of study design early in the paper                                                                                                                                                                                                                                                                                                                                                                                                                | Page5              |
| Setting                   | 5      | Describe the setting, locations, and relevant dates, including periods of recruitment, exposure, follow-up, and data collection                                                                                                                                                                                                                                                                                                                                        | Page5              |
| Participants              | 6      | (a) <i>Cohort study</i> —Give the eligibility criteria, and the sources and methods of selection of participants. Describe methods of follow-up<br><i>Case-control study</i> —Give the eligibility criteria, and the sources and methods of case ascertainment and control selection. Give the rationale for the choice of cases and controls<br><i>Cross-sectional study</i> —Give the eligibility criteria, and the sources and methods of selection of participants | Page5-7            |
|                           |        | (b) <i>Cohort study</i> —For matched studies, give matching criteria and number of exposed and unexposed<br><i>Case-control study</i> —For matched studies, give matching criteria and the number of controls per case                                                                                                                                                                                                                                                 | NA                 |
| Variables                 | 7      | Clearly define all outcomes, exposures, predictors, potential confounders, and effect modifiers. Give diagnostic criteria, if applicable                                                                                                                                                                                                                                                                                                                               | Page6-7            |
| Data sources/ measurement | 8*     | For each variable of interest, give sources of data and details of methods of assessment (measurement). Describe comparability of assessment methods if there is more than one group                                                                                                                                                                                                                                                                                   | Page6-7            |
| Bias                      | 9      | Describe any efforts to address potential sources of bias                                                                                                                                                                                                                                                                                                                                                                                                              | Page6-7            |
| Study size                | 10     | Explain how the study size was arrived at                                                                                                                                                                                                                                                                                                                                                                                                                              |                    |
| Quantitative variables    | 11     | Explain how quantitative variables were handled in the analyses. If applicable, describe which groupings were chosen and why                                                                                                                                                                                                                                                                                                                                           | Page7-8            |
| Statistical methods       | 12     | (a) Describe all statistical methods, including those used to control for confounding                                                                                                                                                                                                                                                                                                                                                                                  | Page7-8            |
|                           |        | (b) Describe any methods used to examine subgroups and interactions                                                                                                                                                                                                                                                                                                                                                                                                    | NA                 |
|                           |        | (c) Explain how missing data were addressed                                                                                                                                                                                                                                                                                                                                                                                                                            | Page7-8            |
|                           |        | (d) <i>Cohort study</i> —If applicable, explain how loss to follow-up was addressed<br><i>Case-control study</i> —If applicable, explain how matching of cases and controls was addressed                                                                                                                                                                                                                                                                              | Page7-9            |

|                          |     |                                                                                                                                                                                                              |            |
|--------------------------|-----|--------------------------------------------------------------------------------------------------------------------------------------------------------------------------------------------------------------|------------|
|                          |     | <i>Cross-sectional study</i> —If applicable, describe analytical methods taking account of sampling strategy                                                                                                 |            |
|                          |     | (e) Describe any sensitivity analyses                                                                                                                                                                        |            |
| <b>Results</b>           |     |                                                                                                                                                                                                              |            |
| Participants             | 13* | (a) Report numbers of individuals at each stage of study—eg numbers potentially eligible, examined for eligibility, confirmed eligible, included in the study, completing follow-up, and analysed            | NA         |
|                          |     | (b) Give reasons for non-participation at each stage                                                                                                                                                         | NA         |
|                          |     | (c) Consider use of a flow diagram                                                                                                                                                                           | NA         |
| Descriptive data         | 14* | (a) Give characteristics of study participants (eg demographic, clinical, social) and information on exposures and potential confounders                                                                     | Page8-9    |
|                          |     | (b) Indicate number of participants with missing data for each variable of interest                                                                                                                          | Page8-9    |
|                          |     | (c) <i>Cohort study</i> —Summarise follow-up time (eg, average and total amount)                                                                                                                             | Page8-9    |
| Outcome data             | 15* | <i>Cohort study</i> —Report numbers of outcome events or summary measures over time                                                                                                                          | Page8-9    |
|                          |     | <i>Case-control study</i> —Report numbers in each exposure category, or summary measures of exposure                                                                                                         |            |
|                          |     | <i>Cross-sectional study</i> —Report numbers of outcome events or summary measures                                                                                                                           |            |
| Main results             | 16  | (a) Give unadjusted estimates and, if applicable, confounder-adjusted estimates and their precision (eg, 95% confidence interval). Make clear which confounders were adjusted for and why they were included | Page8-9    |
|                          |     | (b) Report category boundaries when continuous variables were categorized                                                                                                                                    | NA         |
|                          |     | (c) If relevant, consider translating estimates of relative risk into absolute risk for a meaningful time period                                                                                             | Page8-9    |
| Other analyses           | 17  | Report other analyses done—eg analyses of subgroups and interactions, and sensitivity analyses                                                                                                               | NA         |
| <b>Discussion</b>        |     |                                                                                                                                                                                                              |            |
| Key results              | 18  | Summarise key results with reference to study objectives                                                                                                                                                     | Page10     |
| Limitations              | 19  | Discuss limitations of the study, taking into account sources of potential bias or imprecision. Discuss both direction and magnitude of any potential bias                                                   | Page3      |
| Interpretation           | 20  | Give a cautious overall interpretation of results considering objectives, limitations, multiplicity of analyses, results from similar studies, and other relevant evidence                                   | Page10-13  |
| Generalisability         | 21  | Discuss the generalisability (external validity) of the study results                                                                                                                                        | Page 11-13 |
| <b>Other information</b> |     |                                                                                                                                                                                                              |            |
| Funding                  | 22  | Give the source of funding and the role of the funders for the present study and, if applicable, for the original study on which the present article is based                                                | NA         |

\*Give information separately for cases and controls in case-control studies and, if applicable, for exposed and unexposed groups in cohort and cross-sectional studies.

**Note:** An Explanation and Elaboration article discusses each checklist item and gives methodological background and published examples of transparent reporting. The STROBE checklist is best used in conjunction with this article (freely available on the Web sites of PLoS Medicine at <http://www.plosmedicine.org/>, Annals of Internal Medicine at <http://www.annals.org/>, and Epidemiology at <http://www.epidem.com/>). Information on the STROBE Initiative is available at [www.strobe-statement.org](http://www.strobe-statement.org).
